# 1 Maternal pre-pregnant obesity is associated with cord blood 2 metabolomics in a multi-ethnic cohort

3  
4  
5 Ryan J. Schlueter<sup>1,2#</sup>, Fadhl M. Al-Akwaa<sup>3#</sup>, Paula A. Benny<sup>4</sup>, Alexandra Gurary<sup>5</sup>, Guoxiang Xie<sup>6</sup>, Wei  
6 Jia<sup>6</sup>, Shaw J. Chun<sup>4</sup>, Ingrid Chern<sup>1</sup>, Lana X. Garmire<sup>3\*</sup>

7  
8 <sup>1</sup> University of Hawaii, Department of Obstetrics and Gynecology, 1319 Punahou St Ste 824, Honolulu, HI  
9 96826

10 <sup>2</sup>Current address: Atlanta Perinatal Associates, Atlanta, GA

11 <sup>3</sup>Department of Computational Medicine and Bioinformatics, North Campus Research Complex,  
12 University of Michigan, 1600 Huron Parkway, Ann Arbor, MI 48105 USA

13 <sup>4</sup> University of Hawaii Cancer Center, Department of Epidemiology, 701 Ilalo Street, Honolulu, HI 96813

14 <sup>5</sup> University of Hawaii, John A. Burns School of Medicine, Department of Tropical Medicine, Medical  
15 Microbiology and Pharmacology, 651 Ilalo Street, Bioscience Building 320, Honolulu, Hawaii 96813

16 <sup>6</sup> University of Hawaii Cancer Center, Metabolomics Shared Resource, 701 Ilalo Street, Honolulu, HI  
17 96813

18 # These authors contributed equally to this work.

19 \* Corresponding author.

20 Data described in the manuscript, code book, and analytic code will be made available upon request  
21 pending.

22 Emails:

23 RJS: [rjschlue@hawaii.edu](mailto:rjschlue@hawaii.edu)

24 FMA: [alakwaaf@med.umich.edu](mailto:alakwaaf@med.umich.edu)

25 PAB: [pbenny@cc.hawaii.edu](mailto:pbenny@cc.hawaii.edu)

26 AG: [gurary@hawaii.edu](mailto:gurary@hawaii.edu)  
27 GX: [gxie@cc.hawaii.edu](mailto:gxie@cc.hawaii.edu)  
28 WJ: [wjia@cc.hawaii.edu](mailto:wjia@cc.hawaii.edu)  
29 SJC: [shawc@hawaii.edu](mailto:shawc@hawaii.edu)  
30 IC: [ichern07@gmail.com](mailto:ichern07@gmail.com)  
31 LXG: [lgarmire@med.umich.edu](mailto:lgarmire@med.umich.edu)

32  
33  
34

## 35 **Background**

36 Maternal obesity has become a growing global health concern that impacts fetal health and subsequently  
37 predisposes the offspring to medical conditions later in life. However, the metabolic link between maternal  
38 pre-pregnant obesity and offspring has not yet been fully elucidated.

## 39 **Objective**

40 This study aims to investigate metabolomics changes in fetal cord blood associated with obese (BMI>30)  
41 and normal pre-pregnant weight (18.5<BMI<25) mothers.

## 42 **Design**

43 In this study, we conducted a case-control study using coupled untargeted and targeted metabolomics  
44 approach, from the newborn cord blood metabolomes associated with a matched discovery cohort of 28  
45 cases and 29 controls for maternal pre-pregnant obesity. The subjects are recruited from multi-ethnic  
46 populations in Hawaii, including rarely reported Native Hawaiian and other Pacific Islanders (NHPI). The  
47 results are subsequently validated in by an indepdent cohort of 12 cases and 18 controls.

48

## 49 **Results**

50 Maternal obesity is the most important factor contributing to differences in cord blood metabolomics. Using  
51 elastic net regularization based logistic regression model, we identify 29 metabolites as early-life  
52 biomarkers manifesting intrauterine effect of maternal obesity, with accuracy as high as 0.947 even after  
53 adjusting for clinical confounding (maternal ethnicity etc). This obese model is validated in a separate  
54 cohort (N=30) with accuracy of 0.822. Among the metabolites, six metabolites of them (galactonic acid,  
55 butenylcarnitine, 2-hydroxy-3-methylbutyric acid, phosphatidylcholine diacyl C40:3, 1,5-anhydrosorbitol,  
56 and phosphatidylcholine acyl-alkyl 40:3) are individually significantly different between the maternal  
57 obese vs. norm-weight groups. Interestingly, hydroxy-3-methylbutyric acid shows significantly higher levels  
58 in cord blood from the NHPI group in the discovery cohort, compared to asian and caucasian groups. This  
59 trend is also observed in the validation cohort.

60

## 61 **Conclusions**

62 The work here demonstrates the significant associations between maternal pre-pregnant obesity and  
63 offspring metabolomics alternation at birth, revealing the inter-generational impact of maternal obesity.

64

65

## 66 **Keywords**

67 Metabolite; metabolomics; obesity; native hawaiian; polynesian; bioinformatics; analysis; mother

68

## 69 **Introduction**

70

71 Obesity is a global health concern. While some countries have a relative paucity of obesity, in the United  
72 States, obesity affects 38% of adults (1, 2). As such, maternal obesity has risen to epidemic proportions in  
73 recent years and can impose significant risk to both the mother and unborn fetus. Recently, research has

74 focused on the association of maternal health during pregnancy and the subsequent effects on the future  
75 health of offspring (3). Since the inception of Barker's hypothesis in the 1990's, efforts to connect  
76 intrauterine exposures with the development of disease later in life has been the subject of many studies  
77 (4). Both obesity and its accompanying morbidities, such as diabetes, cardiovascular diseases and cancers,  
78 are of particular interest as considerable evidence has shown that maternal metabolic irregularities may  
79 have a role in genotypic programming in offspring (5, 6). Identifying markers of predisposition to health  
80 concerns or diseases would present an opportunity for early identification and potential intervention, thus  
81 providing life-long benefits (7-9).

82 Previous studies have found that infants born to obese mothers consistently demonstrate elevation of  
83 adiposity and are at more substantial risk for the development of metabolic disease (10). While animal  
84 models have been used to demonstrate early molecular programming under the effect of obesity, human  
85 research to elucidate the underlying mechanisms in origins of childhood disease is lacking (11). In  
86 *Drosophila melanogaster*, offspring of females given a high-sucrose diet exhibited metabolic aberrations  
87 both at the larvae and adult developmental stages (12, 13). Though an invertebrate model, mammalian lipid  
88 and carbohydrate systems show high level of conservation in *Drosophila melanogaster* (14, 15). In a mouse  
89 model of maternal obesity, progeny demonstrated significant elevations of both leptin and triglycerides  
90 when compared with offspring of control mothers of normal weight (5). The authors proposed that  
91 epigenetic modifications of obesogenic genes during intrauterine fetal growth play a role in adaption to an  
92 expected future environment. Recently, Tillery *et al.* used a primate model to examine the origins of  
93 metabolic disturbances and altered gene expression in offspring subjected to maternal obesity (16). The  
94 offspring consistently displayed significant increases in triglyceride level and also fatty liver disease on  
95 histologic preparations. However, human studies that explore the fetal metabolic consequences of maternal  
96 obesity are still in need of investigation.

97  
98 Metabolomics is the study of small molecules using high throughput platforms, such as mass spectroscopy  
99 (17). It is a desirable technology that can detect distinct chemical imprints in tissues and body fluids (18).

100 The field of metabolomics has shown great promise in various applications including early diagnostic  
101 marker identification (19), where a set of metabolomics biomarkers can differentiate samples of two  
102 different states (eg. disease and normal states). Cord blood metabolites provide information on fetal  
103 nutritional and metabolic health (20), and could provide an early window of detection to potential health  
104 issues among newborns. Previously, some studies have reported differential metabolite profiles associated  
105 with pregnancy outcomes such as intrauterine growth restriction (21) and low birth weight (22). For  
106 example, abnormal lipid metabolism and significant differences in relative amounts of amino acids were  
107 found in metabolomic signatures in cord blood from infants with intrauterine growth restriction in  
108 comparison to normal weight infants (21). In another study higher phenylalanine and citrulline levels but  
109 lower glutamine, choline, alanine, proline and glucose levels were observed in cord blood of infants of low-  
110 birth weight (22). However, thus far no metabolomics studies have been reported to specifically investigate  
111 the impact of maternal obesity on metabolomics profiles in fetal cord blood (21-24).

112  
113 This study aims to investigate metabolomics changes in fetal cord blood associated with obese (BMI>30)  
114 and normal pre-pregnant weight (18.5<BMI<25) mothers. Uniquely, we recruited mothers from the multi-  
115 ethnic population in Hawaii, including Native Hawaiian and other Pacific Islanders (NHPI). NHPI is a  
116 particularly under-represented minority population across most scientific studies. To ensure the quality of  
117 the study, we enrolled the mothers undergoing elected C-sections without any clinically known gestational  
118 diseases. In addition to the cord blood samples of their babies at birth, we collected comprehensive EMR  
119 records from the subjects, other maternal and paternal parameters such as ethnicities. To confirm the  
120 scientific rigor, we validated the model and observations from another case-control cohort of 30 subjects.  
121 This study has discovered the metabolomic links between cord blood and maternal pre pregnant obesity  
122 and identified potential early-life metabolite biomarkers associated with maternal obesity.

123

124 **Methods**

125

## 126 **Study population**

127 We performed a multi-ethnic case-control study at Kapiolani Medical Center for Women and Children,  
128 Honolulu, HI from June 2015 through June 2017. The study was approved by the Western IRB board  
129 (WIRB Protocol 20151223). To avoid confounding of inflammation accompanying labor and natural births  
130 (25) we recruited women scheduled for full-term cesarean section at  $\geq 37$  weeks gestation. All subjects  
131 fasted for at least 8 hours before the scheduled cesarean delivery. Patients meeting inclusion criteria were  
132 identified from pre-admission medical records with pre-pregnancy BMI  $\geq 30.0$  (cases) or 18.5-25.0  
133 (controls). The pre-pregnancy BMIs were also confirmed during the enrollment. Women with preterm  
134 rupture of membranes (PROM), labor, multiple gestations, pre-gestational diabetes, hypertensive disorders,  
135 cigarette smokers, HIV, HBV, and chronic drug users were excluded. Clinical characteristics were  
136 recorded, including maternal and paternal age, maternal and paternal ethnicities, mother's pre-pregnancy  
137 BMI, net weight gain, gestational age, parity, gravidity and ethnicity. For the discovery cohort, a total of  
138 57 subjects (28 cases and 29 controls) were recruited. Additionally, to confirm the results, we recruited 30  
139 subjects (12 cases and 18 controls) from the same site but different time interval (July 2017 to June 2018).

140

## 141 **Sample collection, preparation and quality control**

142 Cord blood was collected under sterile conditions at the time of cesarean section using Pall Medical cord  
143 blood collection kit with 25 mL citrate phosphate dextrose (CPD) in the operating room. The umbilical cord  
144 was cleansed with chlorhexidine swab before collection to ensure sterility. The volume of collected blood  
145 was measured and recorded before aliquoting to conicals for centrifugation. Conicals were centrifuged at  
146 200g for 10 minutes, with break off, and plasma was collected. The plasma was centrifuged at 350g for 10  
147 minutes, with break on, aliquoted into polypropylene cryotubes, and stored at -80C.

148

## 149 **Metabolome profiling**

150 The plasma samples were thawed and extracted with 3-vol cold organic mixture of ethanol: chloroform and  
151 centrifuged at 4 °C at 13500 rpm for 20 min. The supernatant was split for lipid and amino acid profiling  
152 with an Acquity ultra performance liquid chromatography coupled to a Xevo TQ-S mass spectrometry  
153 (UPLC-MS/MS, Waters Corp., Milford, MA). Metabolic profiling of other metabolites including organic  
154 acids, carbohydrates, amino acids, and nucleotides were measured with an Agilent 7890A gas  
155 chromatography coupled to a Leco Pegasus time of flight mass spectrometry (Leco Corp., St Joseph, MI).  
156 The raw data files generated from LC-MS (targeted) and GC-MS (untargeted) were processed with  
157 TargetLynx Application Manager (Waters Corp., Milford, MA) and ChromaTOF software (Leco Corp., St  
158 Joseph, MI) respectively. Peak signal, mass spectral data, and retention times were obtained for each  
159 metabolite. The detected metabolites from GC-MS were annotated and combined using an automated mass  
160 spectral data processing (AMSDP) software package (26). The levels of lipids and amino acids detected  
161 from LC-MS were calculated with calibration curves established with reference standards.

## 162 **Metabolomics data processing**

163 We conducted data pre-processing similar to the previous report (27). Briefly, we used K-Nearest  
164 Neighbors (KNN) method to impute missing metabolomics data (28). To adjust for the offset between high  
165 and low-intensity features, and to reduce the heteroscedasticity, the logged value of each metabolite was  
166 centred by its mean and autoscaled by its standard deviation (29). We used quantile normalization to reduce  
167 sample-to-sample variation (30). We applied partial least squares discriminant analysis (PLS-DA) to  
168 visualize how well metabolites could differentiate the obese from normal samples. To explore the  
169 contribution of different clinical/physiological factors to metabolomics data, we conducted source of  
170 variation analysis. We used comBat Bioconductor R package (31) to adjust for the batch effects in the  
171 metabolomics data.

## 172 **Classification modeling and evaluation**

173 To reduce the dimensionality of our data (230 metabolites vs 57 samples), we selected the unique  
174 metabolites associated with separating obese and normal status. To achieve this, we used a penalized

175 logistic regression method called elastic net that was implemented in the `glmnet` R package (32). Elastic  
176 net method selects metabolites that have non-zero coefficients as features, guided by two penalty parameters  
177 alpha and lambda (32). Alpha sets the degree of mixing between lasso (when alpha=1) and the ridge  
178 regression (when alpha=0). Lambda controls the shrink rate of coefficients regardless of the value of alpha.  
179 When lambda equals zero, no shrinkage is performed and the algorithm selects all the features. As lambda  
180 increases, the coefficients are shrunk more strongly and the algorithm retrieves all features with non-zero  
181 coefficients. To find optimal parameters, we performed 10-fold cross-validation that yield the smallest  
182 prediction minimum square error (MSE). We then used the metabolites selected by the elastic net to fit the  
183 regularized logistic regression model. Three parameters were tuned: cost, which controls the trade-off  
184 between regularization and correct classification, logistic loss and epsilon, which sets the tolerance of  
185 termination criterion for optimization.

186 To construct and evaluate the model, we divided samples into 5 folds. We trained the model on four folds  
187 (80% of data) using leave one out cross validation (LOOCV) and measured model performance on the  
188 remaining fold (20% of data). We carried out the above training and testing five times on all folds  
189 combination. We plotted the receiver-operating characteristic (ROC) curve for all folds prediction using  
190 `pROC` R package. To adjust confounding other clinical covariants such as ethnicity, gravidity and parity,  
191 we reconstructed the metabolomics model above by including these factors.

## 192 **Analysis on metabolite features**

193 We used Classification And REgression Training (CARET) R package to rank metabolites based on the  
194 model-based approach (33). In this approach, each metabolite was assigned a score that estimates its  
195 contribution to the model performance (34). These scores were scaled to have a maximum of 100. We  
196 performed metabolomic pathway analysis on metabolites chosen by the elastic net method using  
197 Consensus Pathway DataBase (CPDB). We used `rcorr` function implemented in `Hmisc` R package to  
198 compute the correlations among clinical and metabolomics data.

## 199 **Data availability**



200 The metabolomics data generated by this study is deposited to Metabolomics workbench (Study ID  
201 ST001114).

202

## 203 **Results**

204

### 205 **Cohort subjects characteristics**

206 Our discovery cohort consisted of three ethnic groups: Caucasian, Asian and Native Hawaiian and other  
207 Pacific Islander (NHPI). Women undergoing scheduled cesarean delivery were included based on the  
208 previously described inclusion and exclusion criteria (Methods). Demographical and clinical characteristics  
209 in obese and control groups are summarized in Table 1. In the Caucasian group (10 mothers), 6 were  
210 categorized as non-obese and 4 as obese. In the Asian group (23 mothers), 16 were categorized as non-  
211 obese and 7 as obese. In the NHPI group (24 mothers), 7 (24%) were categorized as non-obese and 17  
212 (61%) as obese. The variation in recruitment of cases versus controls in each ethnic background reflects  
213 the demographics in Hawaii. Compared to mothers of normal pre-pregnant BMI, obese mothers have  
214 significantly higher pre-pregnancy BMI (33.51 $\pm$  4.49 vs 21.89  $\pm$  1.86 kg/m<sup>2</sup>, p=9.18e-11). Mothers have  
215 no statistical difference regarding their ages (32.10  $\pm$  4.88 vs 32.48  $\pm$  5.66, p=0.7) or gestational age  
216 (39.04 weeks $\pm$  0.22 vs 38.93  $\pm$  0.45 p=0.38), excluding the possibility of confounding from these factors.  
217 Babies of obese mothers have significantly (P=0.03) higher birth weight compared to the normal pre  
218 pregnant weight group, consistent with earlier observations (35, 36).

219

### 220 **Preliminary assessment of metabolomics results**

221 We detected a total of 230 metabolites, including 79 untargeted and 151 targeted metabolites (11 amino  
222 acids, and 140 lipids). To explore which clinical/physiological covariates are associated with the variations  
223 in the metabolomics, we conducted source of variation analysis. Indeed, maternal obesity is the  
224 predominant most important factor contributing to metabolomic difference, rather than other factors

225 (Figure 1A). To test if these metabolites allow clear separation between the obese and normal-weight  
226 subjects, we used elastic net regularization based logistic regression, rather than the partial least squares  
227 (PLS) model, a routine supervised multivariate method which only yielded modest accuracy AUC=0.62  
228 (Figure 1S). Elastic net regularization overcomes the limitation of either ridge and lasso regularization  
229 alone, and combines their strengths to identify an optimized set metabolites [25]. Using the optimized  
230 regularization parameters (Figure. 2S), we identified a total of 29 metabolite features, which together yields  
231 the highest predictive performance with AUC=0.97, 95 % CI=[0.904-0.986] in 20% hold-out test dataset  
232 (Figure 1B). Among them, six metabolites have large contributions to the separations between case/control,  
233 with an importance score of at least 70% individually (Figure 1C). These are galactonic acid,  
234 butenylcarnitine (C4:1), 2-hydroxy-3-methylbutyric acid, phosphatidylcholine diacyl C40:3 (PC aa C40:3),  
235 1,5-anhydrosorbitol, and phosphatidylcholine acyl-alkyl 40:3 (PC ae C40:3). Thus, metabolites selected by  
236 the elastic net method indeed improved the prediction power of the model.

237

### 238 **Calibrated maternal-obese predictive model with consideration of confounding**

239

240 For statistical rigor, it is important to consider possible confounders, such as maternal/paternal ethnicity and  
241 parity (Table 1) during the analysis. Towards this, we conducted two investigations. First, we explored the  
242 correlations among the demographic factors and metabolomics data. It is evident that several metabolites  
243 are correlated with maternal and paternal ethnicity, gravidity, and/or parity (Figure 2-A). For example,  
244 maternal ethnicity is positively correlated with 2-hydroxy-3-methylbutyric acid. Secondly, we built a  
245 logistic regression model using the above-mentioned four covariates alone (parity, gravidity, maternal and  
246 paternal ethnicity). This model yields a modest AUC of 0.701 95% CI=[0.55-0.82] (Figure 3S-A), again  
247 suggesting existence of confounding. These observations prompted us to recalibrate the 29-metabolite  
248 elastic net model, by adjusting the metabolomics model using all collected clinical covariates (Figure 2B).  
249 The resulting modified model remains to have very high accuracy, with AUC= 0.947, 95% CI= [0.87-0.97].

250 In the new model, besides the original 6 metabolite features, maternal ethnicity and paternal ethnicity also  
251 have importance scores greater than 70% (Figure 2C).

252

### 253 **Metabolite features and their pathway and enrichment analysis**

254 The 29 metabolite features selected by the model belong to acylcarnitine, glycerophospholipid, amino acids  
255 and organic acids classes. Their log fold changes ranged from -0.45 (Hydroxyhexadecenoylcarnitine, or  
256 C16:1-OH) to 0.66 (2-hydroxy-3-methylbutyric acid) (Figure 3A). Among them, 15 metabolites are higher  
257 in obese associated cord blood samples, including 2-hydroxy-3-methylbutyric acid, galactonic acid, PC ae  
258 C40:3, Propionylcarnitine (C3), PC aa C40:3, O-butanoyl-carnitine (C4:1), Hexanoylcarnitine (C6 (C4:1 -  
259 DC)) , Phosphatidylcholine diacyl C40:2 (PC aa C40:2), benzoic acid, 1,5-anhydrosorbitol,  
260 Isovalerylcarnitine (C5), PC ae C40:2, L-arabitol, Octadecenoylcarnitine (C18:1) (Figure 3A, Table 2) .  
261 The remaining 14 metabolites are lower in obese associated cord blood samples: malic acid, L-aspartic acid,  
262 citric acid, PC ae C34:0, isoleucine, PC ae C36:2, oleic acid, PC aa C36:5, PC ae C34:3, PC ae C40:6,  
263 C5:1-DC, 2-hydroxybutyric acid, myoinositol, and C16:1 -OH (Figure 3A, Table 2). The individual  
264 metabolite levels of Hexanoylcarnitine (C6(C4:1-DC)), O-butanoyl-carnitine (C4:1), PC aa C40:3,  
265 Propionylcarnitine (C3), PC ae C40:3, galactonic acid, and 2-hydroxy-3-methylbutyric acid increased  
266 significantly in obese cases ( $p < 0.05$ , t-test).

267 To elucidate the biological processes in newborns that may be effected by maternal obesity, we performed  
268 pathway enrichment analysis on the 29 metabolite features, using Consensus pathway database (CPDB)  
269 tool (37). We combined multiple pathway databases including KEGG, Wikipathways, Reactome, EHNM  
270 and SMPDB. A list of 10 pathways are enriched with adjusted p-value  $q < 0.05$  (Figure 3B). Among them,  
271 alanine and aspartate metabolism is the most significantly enriched pathway ( $q = 0.004$ ). Transmembrane  
272 transport of small molecules and SLC-mediated transmembrane transport are also significantly enriched  
273 ( $q = 0.004$  and  $q = 0.01$  respectively).

274

### 275 **The influence of ethnicity on metabolite levels**

276 Our earlier correlational analysis suggested that maternal ethnicity may be correlated with 2-hydroxy-3-  
277 methylbutyric acid level (Figure 2A). To confirm this, we conducted 2-way ANOVA statistical tests and  
278 indeed obtained significant p-value ( $P=0.023$ , chi-square test). We thus stratified the levels of 2-hydroxy-  
279 3-methylbutyric acid by ethnicity (Figure 4). There is no significant difference in normal pre pregnant-  
280 weight subjects across the three ethnic groups (Figure 4A). However, in cord blood samples associated with  
281 obese mothers, the concentration of 2-hydroxy-3-methylbutyric acid is much higher in NHPI, as compared  
282 to Caucasians ( $p=0.05$ ) or Asians ( $p=0.04$ ) (Figure 4B). 2-hydroxy-3-methylbutyric acid originates mainly  
283 from ketogenesis through the metabolism of valine, leucine and isoleucine (38). Since all subjects have  
284 fasted 8 hours before the C-section, we expect the confounding from diets is minimized among the three  
285 ethnical groups. Thus the higher 2-hydroxy-3-methylbutyric acid level may indicate the higher efficiency  
286 of ketogenesis in babies born from obese NHPI mothers.

287

### 288 **Validation on an independent cohort**

289 To test the robustness of our results, we applied our model on a new cohort of 30 patients (18 normal-  
290 weight and 12 obese). We then performed new metabolomics measurements and processed the data as  
291 earlier. Using the model built on 57 samples, we tested its performance on the new 30 samples, and obtained  
292 an AUC of 0.822 (95% CI= [0.74-0.89]), confirming the reproducibility of our findings. Moreover, we  
293 observed a similar trend of higher concentration of 2-hydroxy-3-methylbutyric acid in NHPI compared to  
294 Asians and Caucasians ( $p=0.001$ ) in the obese group, whereas no statistical difference between ethnicities  
295 exists in the control group. Moreover, within this cohort, four of the six metabolites that had large  
296 contributions to the separations between case/control (importance score  $> 70\%$ ) in the discovery cohort,  
297 has consistent trend of changes in the validation cohort.

298

### 299 **Discussion**

300

301 This study aims to distinguish key cord blood metabolites associated with maternal pre-pregnancy obesity.  
302 The novelty of the study is manifested in several folds. First, we have collected a unique multi-ethnic  
303 population in Hawaii over a period of 3 years (2015-2018), which includes Asian, NHPI and Caucasians,  
304 following very strict inclusion/exclusion criteria (esp. on matching gestational weight gain). Secondly, we  
305 utilize state of the art metabolomics technology platform coupling GC-MS and LC-MS platforms, which  
306 allows us to detect hundreds of metabolites simultaneously. Lastly, we use the state of art method called  
307 elastic net based logistic regression that drastically improves the classification accuracy on cord blood  
308 metabolomics data.

309 To ensure the quality of metabolomics data, our study set most stringent inclusion and exclusion criteria to  
310 exclude as many confounding factors as possible. To avoid the confounding from labor and vaginal delivery,  
311 we only targeted mothers having elective C-sections. We also excluded obese mothers who had known  
312 complications during pregnancy, such as pre-gestational diabetes, smoking, and hypertension. These  
313 criteria helped to improve the quality of the metabolomics data. To minimize confounding due to maternal  
314 diet, all subjects fasted 8 hours before the Cesarean section.

315 Such careful experimental design did yield good data quality, as the source of variation analysis did show  
316 that maternal obesity is the only dominate factor contributing to metabolomics difference in the cord blood.  
317 Additionally, we conducted rigorous statistical modeling and found that metabolites can distinguish the two  
318 maternal groups with accuracy as high as  $AUC=0.97$  under cross-validation (or 0.947 after adjusting for  
319 confounding effects). Metabolomics pathway analysis on the metabolite features in the model identified 10  
320 significant pathways. Among them, alanine and aspartate metabolism was previously reported to be  
321 associated with obesity (39). Transmembrane transport was identified as another significant pathway. The  
322 transmembrane transport pathway corresponds to the acylcarnitine metabolites in the features.  
323 Acylcarnitines are known transmembrane transporters of fatty acids across the mitochondrial membrane  
324 (40). Among all metabolites and physiological/demographic features selected by the combined model,  
325 galactonic acid has the largest impact on the model performance (importance score =86%). Galactonic acid,

326 was previously shown to be associated with diabetes in a mouse model, due to a proposed mechanism of  
327 oxidative stress (41). On the other hand, maternal ethnicity has the largest impact among physiological  
328 factors (importance score =84%).

329 A very few cord blood metabolomics studies have been carried out to associate with maternal obesity  
330 directly, or birth weight (22, 42, 43). In a recent Hyperglycemia and Adverse Pregnancy Outcome (HAPO)  
331 Study, Lowe et al. reported that branched-chain amino acids such as valine, phenylalanine, leucine/isoleucine  
332 and AC C4, AC C3, AC C5 are associated with maternal BMI in a meta-analysis over 4 large cohorts (400  
333 subjects in each) (43). In another study to associate cord blood metabolomics with low birth weight (LBW),  
334 Ivorra et al. found that newborns of LBW (birth weight < 10th percentile, n = 20) had higher levels of  
335 phenylalanine and citrulline, compared to the control newborns (birth weight between the 75th-90th  
336 percentiles, n = 30) (22). They also found lower levels of choline, proline, glutamine, alanine and glucose  
337 in new borns of LBW, however, there was no significant differences between the mothers of the two groups.  
338 In our study, isoleucine is also identified as one of the 29 metabolite features related to maternal obesity;  
339 although alanine itself is not selected by the model to be a maternal obesity biomarker in cord blood, we  
340 did find that alanine and aspartate metabolism are enriched in the cord blood samples associated with  
341 maternal obesity group.

342 Notably, our study has identified 5 metabolites which are previously not reported in the literature with  
343 association to obesity or maternal obesity: galactonic acid, L-arabitol, indoxyl sulfate, 2-hydroxy-3-  
344 methylbutyric acid and citric acid. Except citric acid, all the other four metabolites are increased in obese  
345 associated cord blood samples. 2-hydroxy-3-methylbutyric acid concentrations varied by ethnicity, but only  
346 in babies born from obese pre-pregnant mothers. 2-hydroxy-3-methylbutyric acid is known to accumulate  
347 in high levels during ketoacidosis and fatty acid breakdown. Therefore, the higher elevation of 2-hydroxy-  
348 3-methylbutyric acid is likely due to increased cellular ketoacidosis and fatty acid breakdown in new borns  
349 from obese pre-pregnant mothers. To the best of our knowledge, this is the first study that shows differences  
350 in the 2-hydroxy-3-methylbutyric acid concentration levels among different ethnicities. Additionally,

351 Indoxyl sulfate is a metabolite of the amino acid tryptophan. As tryptophan is commonly found in fatty  
352 food, red meat and cheese, it is possible that high levels of indoxyl sulfate detected in the cord blood  
353 associated with obese pre-pregnant mothers could be due to the maternal high fat diet. Oppositely, citric  
354 acid, a compound associated with the citric acid cycle (44), is decreased in the cord blood associated with  
355 obese pre-pregnant mothers. This could be related to the lower vegetable and fruit consumptions among  
356 obese pre-pregnant mothers. In all, the data suggest that maternal obesity may impact offspring cord blood  
357 metabolites. Further research into the specific mode of action of these metabolites would be beneficial in  
358 understanding its association with maternal obesity.

359

360 This study may benefit from some improvmenet in the future follow-up s. We determined the subjects'  
361 ethnicity by self-reporting rather than genotyping, due to the restriction of the currently approved IRB  
362 protocol. Additionally, there has been debates on the use of BMI as an indicator of obesity (45), more direct  
363 measures of body fat could be considered such as skin-fold thickness measurements, bioelectrical  
364 impedance and energy x-ray absorptiometry (46, 47). Nevertheless, this study has established relationships  
365 between cord blood metabolomics with maternal pre-pregnant obesity, which in turn is associated with  
366 social economical disparities.

367

## 368 **Conclusion**

369

370 In this study, we identified 29 metabolites that are associated with maternal obesity, 5 of which are  
371 previously unreported in the literature. These metabolites have the potential to be maternal obesity-related  
372 bio-markers in newborns that warranty dietary interventions in early-life.

373

374

375 **Author Contributions**

376 LXG envisioned the project, obtained funding, designed and supervised the project and data analysis. RJS,  
377 IC, PAB and SJC collected the samples. AG prepared the plasma samples. FMA analyzed the data. GX  
378 performed the metabolomics experiments. RJS, FMA, PAB, AG, GX, SJC and LXG wrote the manuscript.  
379 All authors have read, revised, and approved the manuscript.

380

### 381 **Competing financial interests**

382 The authors declare no competing financial interests.

383

### 384 **Acknowledgements**

385 We thank Drs. Joseph Kaholokula and Alike Maunakea from the Native Hawaiian Health Department of  
386 University of Hawaii for giving suggestions. The authors acknowledge the services provided by the  
387 Molecular and Cellular Immunology Core which is funded in part by P30GM114737 from the Centers of  
388 Biomedical Research Excellence (COBRE) program of the National Institute of General Medical Sciences,  
389 a component of the National Institutes of Health. Dr. Lana Garmire's research is supported by grants  
390 K01ES025434 awarded by NIEHS through funds provided by the trans-NIH Big Data to Knowledge  
391 (BD2K) initiative (<http://datascience.nih.gov/bd2k>), P20 COBRE GM103457 awarded by NIH/NIGMS,  
392 R01 LM012373 awarded by NLM, and R01 HD084633 awarded by NICHD to LX Garmire. Funding was  
393 also provided in part by the Department of Obstetrics and Gynecology, University of Hawaii. The  
394 metabolomics services were provided by the UH Cancer Center Metabolomics Shared Resource.

395

396

397

398

399

### 400 **References**

401



- 402 1. Flegal KM, Carroll MD, Kit BK, Ogden CL. Prevalence of obesity and trends in the  
403 distribution of body mass index among us adults, 1999-2010. *JAMA* 2012;307(5):491-7.  
404 doi: 10.1001/jama.2012.39.
- 405 2. Ogden CL, Carroll MD, Kit BK, Flegal KM. Prevalence of obesity in the United States,  
406 2009-2010. *NCHS Data Brief* 2012(82):1-8.
- 407 3. Smith CJ, Ryckman KK. Epigenetic and developmental influences on the risk of obesity,  
408 diabetes, and metabolic syndrome. *Diabetes Metab Syndr Obes* 2015;8:295-302. doi:  
409 10.2147/DMSO.S61296.
- 410 4. Barker DJ. Fetal origins of coronary heart disease. *BMJ* 1995;311(6998):171-4.
- 411 5. Li CC, Young PE, Maloney CA, Eaton SA, Cowley MJ, Buckland ME, Preiss T,  
412 Henstridge DC, Cooney GJ, Febbraio MA, et al. Maternal obesity and diabetes induces  
413 latent metabolic defects and widespread epigenetic changes in isogenic mice.  
414 *Epigenetics* 2013;8(6):602-11. doi: 10.4161/epi.24656.
- 415 6. Pi-Sunyer X. The medical risks of obesity. *Postgrad Med* 2009;121(6):21-33. doi:  
416 10.3810/pgm.2009.11.2074.
- 417 7. Isganaitis E, Rifas-Shiman SL, Oken E, Dreyfuss JM, Gall W, Gillman MW, Patti ME.  
418 Associations of cord blood metabolites with early childhood obesity risk. *Int J Obes*  
419 (Lond) 2015;39(7):1041-8. doi: 10.1038/ijo.2015.39.
- 420 8. Rauschert S, Uhl O, Koletzko B, Hellmuth C. Metabolomic biomarkers for obesity in  
421 humans: a short review. *Ann Nutr Metab* 2014;64(3-4):314-24. doi: 10.1159/000365040.
- 422 9. Hivert MF, Perng W, Watkins SM, Newgard CS, Kenny LC, Kristal BS, Patti ME,  
423 Isganaitis E, DeMeo DL, Oken E, et al. Metabolomics in the developmental origins of  
424 obesity and its cardiometabolic consequences. *J Dev Orig Health Dis* 2015;6(2):65-78.  
425 doi: 10.1017/S204017441500001X.
- 426 10. Heerwagen MJ, Miller MR, Barbour LA, Friedman JE. Maternal obesity and fetal  
427 metabolic programming: a fertile epigenetic soil. *Am J Physiol Regul Integr Comp*  
428 *Physiol* 2010;299(3):R711-22. doi: 10.1152/ajpregu.00310.2010.
- 429 11. Rauschert S, Kirchberg FF, Marchioro L, Koletzko B, Hellmuth C, Uhl O. Early  
430 Programming of Obesity Throughout the Life Course: A Metabolomics Perspective. *Ann*  
431 *Nutr Metab* 2017;70(3):201-9. doi: 10.1159/000459635.
- 432 12. Brookheart RT, Duncan JG. *Drosophila melanogaster*: An emerging model of  
433 transgenerational effects of maternal obesity. *Mol Cell Endocrinol* 2016;435:20-8. doi:  
434 10.1016/j.mce.2015.12.003.
- 435 13. Brookheart RT, Swearingen AR, Collins CA, Cline LM, Duncan JG. High-sucrose-  
436 induced maternal obesity disrupts ovarian function and decreases fertility in *Drosophila*  
437 *melanogaster*. *Biochim Biophys Acta* 2017;1863(6):1255-63. doi:  
438 10.1016/j.bbadis.2017.03.014.
- 439 14. Trinh I, Boulianne GL. Modeling obesity and its associated disorders in *Drosophila*.  
440 *Physiology (Bethesda)* 2013;28(2):117-24. doi: 10.1152/physiol.00025.2012.
- 441 15. Diop SB, Bodmer R. *Drosophila* as a model to study the genetic mechanisms of obesity-  
442 associated heart dysfunction. *J Cell Mol Med* 2012;16(5):966-71. doi: 10.1111/j.1582-  
443 4934.2012.01522.x.
- 444 16. Aagaard-Tillery KM, Grove K, Bishop J, Ke X, Fu Q, McKnight R, Lane RH.  
445 Developmental origins of disease and determinants of chromatin structure: maternal diet  
446 modifies the primate fetal epigenome. *J Mol Endocrinol* 2008;41(2):91-102. doi:  
447 10.1677/JME-08-0025.
- 448 17. Wishart DS, Tzur D, Knox C, Eisner R, Guo AC, Young N, Cheng D, Jewell K, Arndt D,  
449 Sawhney S, et al. HMDB: the Human Metabolome Database. *Nucleic Acids Res*  
450 2007;35(Database issue):D521-6. doi: 10.1093/nar/gkl923.
- 451 18. Ciborowski M, Zbucka-Kretowska M, Bomba-Opon D, Wielgos M, Brawura-Biskupski-  
452 Samaha R, Pierzynski P, Szmitkowski M, Wolczynski S, Lipinska D, Citko A, et al.

- 453 Potential first trimester metabolomic biomarkers of abnormal birth weight in healthy  
454 pregnancies. *Prenat Diagn* 2014;34(9):870-7. doi: 10.1002/pd.4386.
- 455 19. Gowda GA, Zhang S, Gu H, Asiago V, Shanaiah N, Raftery D. Metabolomics-based  
456 methods for early disease diagnostics. *Expert Rev Mol Diagn* 2008;8(5):617-33. doi:  
457 10.1586/14737159.8.5.617.
- 458 20. Sanz-Cortes M, Carbajo RJ, Crispi F, Figueras F, Pineda-Lucena A, Gratacos E.  
459 Metabolomic profile of umbilical cord blood plasma from early and late intrauterine  
460 growth restricted (IUGR) neonates with and without signs of brain vasodilation. *PLoS*  
461 *One* 2013;8(12):e80121. doi: 10.1371/journal.pone.0080121.
- 462 21. Favretto D, Cosmi E, Ragazzi E, Visentin S, Tucci M, Fais P, Cecchetto G, Zanardo V,  
463 Viel G, Ferrara SD. Cord blood metabolomic profiling in intrauterine growth restriction.  
464 *Anal Bioanal Chem* 2012;402(3):1109-21. doi: 10.1007/s00216-011-5540-z.
- 465 22. Ivorra C, Garcia-Vicent C, Chaves FJ, Monleon D, Morales JM, Lurbe E. Metabolomic  
466 profiling in blood from umbilical cords of low birth weight newborns. *J Transl Med*  
467 2012;10:142. doi: 10.1186/1479-5876-10-142.
- 468 23. La Torre D, Seppanen-Laakso T, Larsson HE, Hyotylainen T, Ivarsson SA, Lernmark A,  
469 Oresic M, DiPi SSG. Decreased cord-blood phospholipids in young age-at-onset type 1  
470 diabetes. *Diabetes* 2013;62(11):3951-6. doi: 10.2337/db13-0215.
- 471 24. Zhang A, Sun H, Wang X. Power of metabolomics in biomarker discovery and mining  
472 mechanisms of obesity. *Obes Rev* 2013;14(4):344-9. doi: 10.1111/obr.12011.
- 473 25. Gomez-Lopez N, StLouis D, Lehr MA, Sanchez-Rodriguez EN, Arenas-Hernandez M.  
474 Immune cells in term and preterm labor. *Cell Mol Immunol* 2014;11(6):571-81. doi:  
475 10.1038/cmi.2014.46.
- 476 26. Ni Y, Qiu Y, Jiang W, Suttlemyre K, Su M, Zhang W, Jia W, Du X. ADAP-GC 2.0:  
477 deconvolution of coeluting metabolites from GC/TOF-MS data for metabolomics studies.  
478 *Anal Chem* 2012;84(15):6619-29. doi: 10.1021/ac300898h.
- 479 27. Alkawaa FM, Chaudhary K, Garmire LX. Deep learning accurately predicts estrogen  
480 receptor status in breast cancer metabolomics data. *J Proteome Res* 2017. doi:  
481 10.1021/acs.jproteome.7b00595.
- 482 28. Beretta L, Santaniello A. Nearest neighbor imputation algorithms: a critical evaluation.  
483 *BMC Med Inform Decis Mak* 2016;16 Suppl 3:74. doi: 10.1186/s12911-016-0318-z.
- 484 29. van den Berg RA, Hoefsloot HC, Westerhuis JA, Smilde AK, van der Werf MJ.  
485 Centering, scaling, and transformations: improving the biological information content of  
486 metabolomics data. *BMC Genomics* 2006;7:142. doi: 10.1186/1471-2164-7-142.
- 487 30. Jauhainen A, Madhu B, Narita M, Narita M, Griffiths J, Tavaré S. Normalization of  
488 metabolomics data with applications to correlation maps. *Bioinformatics*  
489 2014;30(15):2155-61. doi: 10.1093/bioinformatics/btu175.
- 490 31. Leek JT, Johnson WE, Parker HS, Jaffe AE, Storey JD. The sva package for removing  
491 batch effects and other unwanted variation in high-throughput experiments.  
492 *Bioinformatics (Oxford, England)* 2012;28(6):882-3. doi: 10.1093/bioinformatics/bts034.
- 493 32. Paolino JP. Rasch Model Parameter Estimation via the Elastic Net. *J Appl Meas*  
494 2015;16(4):353-64.
- 495 33. Kuhn M. Building Predictive Models in R Using the caret Package. 2008 2008;28(5):26.  
496 doi: 10.18637/jss.v028.i05.
- 497 34. Arunajadai SG. Stepwise logistic regression. *Anesth Analg* 2009;109(1):285; author  
498 reply -6. doi: 10.1213/ane.0b013e3181a7b51a.
- 499 35. Briese V, Voigt M, Hermanussen M, Wittwer-Backofen U. Morbid obesity: pregnancy  
500 risks, birth risks and status of the newborn. *Homo* 2010;61(1):64-72. doi:  
501 10.1016/j.jchb.2009.11.002.
- 502 36. Shankar K, Harrell A, Liu X, Gilchrist JM, Ronis MJJ, Badger TM. Maternal obesity at  
503 conception programs obesity in the offspring. *American Journal of Physiology-*

- 504 Regulatory, Integrative and Comparative Physiology 2008;294(2):R528-R38. doi:  
505 10.1152/ajpregu.00316.2007.
- 506 37. Kamburov A, Stelzl U, Lehrach H, Herwig R. The ConsensusPathDB interaction  
507 database: 2013 update. *Nucleic Acids Res* 2013;41(Database issue):D793-800. doi:  
508 10.1093/nar/gks1055.
- 509 38. Liebich HM, Forst C. Hydroxycarboxylic and oxocarboxylic acids in urine: products from  
510 branched-chain amino acid degradation and from ketogenesis. *J Chromatogr*  
511 1984;309(2):225-42.
- 512 39. Sookoian S, Pirola CJ. Alanine and aspartate aminotransferase and glutamine-cycling  
513 pathway: their roles in pathogenesis of metabolic syndrome. *World J Gastroenterol*  
514 2012;18(29):3775-81. doi: 10.3748/wjg.v18.i29.3775.
- 515 40. Longo N, Frigeni M, Pasquali M. Carnitine transport and fatty acid oxidation. *Biochim*  
516 *Biophys Acta* 2016;1863(10):2422-35. doi: 10.1016/j.bbamcr.2016.01.023.
- 517 41. Fahrman J, Grapov D, Yang J, Hammock B, Fiehn O, Bell GI, Hara M. Systemic  
518 alterations in the metabolome of diabetic NOD mice delineate increased oxidative stress  
519 accompanied by reduced inflammation and hypertriglyceremia. *Am J Physiol Endocrinol*  
520 *Metab* 2015;308(11):E978-89. doi: 10.1152/ajpendo.00019.2015.
- 521 42. Santos Ferreira DL, Williams DM, Kangas AJ, Soininen P, Ala-Korpela M, Smith GD,  
522 Jarvelin MR, Lawlor DA. Association of pre-pregnancy body mass index with offspring  
523 metabolic profile: Analyses of 3 European prospective birth cohorts. *PLoS Med*  
524 2017;14(8):e1002376. doi: 10.1371/journal.pmed.1002376.
- 525 43. Lowe WL, Jr., Bain JR, Nodzenski M, Reisseter AC, Muehlbauer MJ, Stevens RD,  
526 Ilkayeva OR, Lowe LP, Metzger BE, Newgard CB, et al. Maternal BMI and Glycemia  
527 Impact the Fetal Metabolome. *Diabetes Care* 2017;40(7):902-10. doi: 10.2337/dc16-  
528 2452.
- 529 44. Muroyama K, Murosaki S, Yamamoto Y, Odaka H, Chung HC, Miyoshi M. Anti-obesity  
530 effects of a mixture of thiamin, arginine, caffeine, and citric acid in non-insulin dependent  
531 diabetic KK mice. *J Nutr Sci Vitaminol (Tokyo)* 2003;49(1):56-63.
- 532 45. Freedman DS, Horlick M, Berenson GS. A comparison of the Slaughter skinfold-  
533 thickness equations and BMI in predicting body fatness and cardiovascular disease risk  
534 factor levels in children. *Am J Clin Nutr* 2013;98(6):1417-24. doi:  
535 10.3945/ajcn.113.065961.
- 536 46. Wohlfahrt-Veje C, Tinggaard J, Winther K, Mouritsen A, Hagen CP, Mieritz MG, de  
537 Renzy-Martin KT, Boas M, Petersen JH, Main KM. Body fat throughout childhood in  
538 2647 healthy Danish children: agreement of BMI, waist circumference, skinfolds with  
539 dual X-ray absorptiometry. *Eur J Clin Nutr* 2014;68(6):664-70. doi:  
540 10.1038/ejcn.2013.282.
- 541 47. Steinberger J, Jacobs DR, Raatz S, Moran A, Hong CP, Sinaiko AR. Comparison of  
542 body fatness measurements by BMI and skinfolds vs dual energy X-ray absorptiometry  
543 and their relation to cardiovascular risk factors in adolescents. *Int J Obes (Lond)*  
544 2005;29(11):1346-52. doi: 10.1038/sj.ijo.0803026.

546

547

548

549

550

551

552

553

554

555

556

557

558

559

560

561

562

563

564

565

566

567

568

569

570

571

572

573

574

575

576

577

578

579

580

581 **Tables**

582

583

584 **Table 1:** Demographical and clinical characteristics in obese and control groups

|                                      | <b>Control(n=29)</b> | <b>Case(n=28)</b> | <b>P-value*</b> |
|--------------------------------------|----------------------|-------------------|-----------------|
|                                      | Mean (SD)            |                   |                 |
| Maternal age, years                  | 32.48 (5.66)         | 32.10 (4.88)      | 0.78            |
| Paternal age, years                  | 34.68(7.14)          | 35.21(6.43)       | 0.79            |
| Pre-pregnancy BMI, kg/m <sup>2</sup> | 21.89(1.86)          | 33.51(4.49)       | 1.12 e-14       |
| Gestational Age, Weeks               | 39.04(0.218)         | 38.93(0.45)       | 0.3812          |
| Net weight gain                      | 30.85(10.92)         | 29.4(13.55)       | 0.7335          |
| Baby weight (kg)                     | 3.29(0.32)           | 3.54(0.5)         | 0.03            |
| Head Circle (cm)                     | 34.89(1.10)          | 35.55(1.36)       | 0.05            |
| Baby length (cm)                     | 51.3(1.9)            | 51.4(2.36)        | 0.8             |
| <b>Parity</b>                        |                      |                   | 0.03            |
| 0                                    | 5                    | 2                 |                 |
| 1                                    | 16                   | 7                 |                 |
| 2                                    | 7                    | 10                |                 |
| 3 and above                          | 1                    | 9                 |                 |

|                           |    |    |      |
|---------------------------|----|----|------|
| <b>Gravidity</b>          |    |    | 0.12 |
| 1                         | 5  | 1  |      |
| 2                         | 12 | 5  |      |
| 3                         | 7  | 8  |      |
| 4 and above               | 5  | 14 |      |
| <b>Maternal Ethnicity</b> |    |    | 0.01 |
| Caucasian                 | 6  | 4  |      |
| Asian                     | 16 | 7  |      |
| Pacific island            | 7  | 17 |      |
| <b>Paternal Ethnicity</b> |    |    | 0.03 |
| Caucasian                 | 8  | 3  |      |
| Asian                     | 14 | 9  |      |
| Pacific island            | 7  | 16 |      |

585

586 \*Categorical variables were compared using chi-square test, whereas continuous variables were compared using *t*

587 test.

588

589

590 **Table 2:** A list of metabolites associated with obese-control maternal status and selected by elastic net

591 regularization based logistic regression. The metabolites are sorted by the average log fold change of cases

592 over controls.

593

| Metabolites                    | Chemical name                                                 | Fold change <sup>a</sup> (case-control) |         | Univariate Analysis <sup>b</sup> |             |
|--------------------------------|---------------------------------------------------------------|-----------------------------------------|---------|----------------------------------|-------------|
|                                |                                                               | logFC                                   | P_value | Coefficient                      | P_value     |
| 2-hydroxy-3-methylbutyric acid | 2-hydroxy-3-methylbutyric acid                                | 0.6609                                  | 0.0119  | 0.65592                          | 0.062950865 |
| Galactonic acid                | Galactonic acid                                               | 0.6337                                  | 0.0158  | 0.640515                         | 0.06565148  |
| PC ae C40:3                    | Phosphatidylcholine acyl-alkyl C40:3                          | 0.6249                                  | 0.0173  | 0.762691                         | 0.035189439 |
| C3                             | Propionylcarnitine                                            | 0.5598                                  | 0.033   | -0.1467                          | 0.648143485 |
| PC aa C40:3                    | Phosphatidylcholine diacyl C40:3                              | 0.5561                                  | 0.0342  | -0.33489                         | 0.318665241 |
| C4:1                           | O-butanoyl-carnitine, butenylcarnitine                        | 0.556                                   | 0.0342  | -0.44274                         | 0.168989046 |
| C6 (C4:1 -DC)                  | Hexanoylcarnitine, Fumaryl carnitine                          | 0.5355                                  | 0.0414  | -0.28551                         | 0.337718    |
| PC aa C40:2                    | Phosphatidylcholine diacyl C40:2                              | 0.4793                                  | 0.0679  | 0.532796                         | 0.113517583 |
| Benzoic acid                   | Benzoic acid                                                  | 0.4549                                  | 0.0831  | 0.279734                         | 0.350259256 |
| 1,5-Anhydrosorbitol            | 1,5-Anhydrosorbitol                                           | 0.3664                                  | 0.1628  | 0.636374                         | 0.24536415  |
| C5                             | Isovalerylcarnitine, Valerylcarnitine, Methylbutyrylcarnitine | 0.3654                                  | 0.1638  | -0.38664                         | 0.196793118 |
| PC ae C40:2                    | Phosphatidylcholine acyl-alkyl C40:2                          | 0.3242                                  | 0.2168  | -0.71475                         | 0.042908449 |
| L-Arabitol                     | L-Arabitol                                                    | 0.2685                                  | 0.3062  | 0.360549                         | 0.266082992 |

|                       |                                            |        |        |          |             |
|-----------------------|--------------------------------------------|--------|--------|----------|-------------|
| C18:1                 | Octadecenoylcarnitine                      | 0.228  | 0.385  | 0.253734 | 0.427416515 |
| Indoxyl sulfate       | Indoxyl sulfate                            | 0.1792 | 0.4948 | -0.06239 | 0.827985019 |
| Malic acid            | Malic acid                                 | -0.006 | 0.9811 | 0.010217 | 0.977502972 |
| L-Aspartic acid       | L-Aspartic acid                            | -0.036 | 0.8899 | -0.18507 | 0.549849292 |
| Citric acid           | Citric acid                                | -0.058 | 0.8242 | -0.08235 | 0.790831897 |
| PC ae C34:0           | Phosphatidylcholine acyl-alkyl<br>C34:0    | -0.091 | 0.7295 | 0.712    | 0.058228623 |
| Isoleucine            | Isoleucine                                 | -0.158 | 0.5473 | -0.56607 | 0.089720981 |
| PC ae C36:2           | Phosphatidylcholine acyl-alkyl<br>C36:2    | -0.193 | 0.4629 | -0.1802  | 0.553764206 |
| Oleic acid            | Oleic acid                                 | -0.2   | 0.4465 | 0.183252 | 0.536574067 |
| PC aa C36:5           | Phosphatidylcholine diacyl<br>C36:5        | -0.218 | 0.4059 | -0.4694  | 0.174139565 |
| PC ae C34:3           | Phosphatidylcholine acyl-alkyl<br>C34:3    | -0.22  | 0.4008 | 0.319963 | 0.31966488  |
| PC ae C40:6           | Phosphatidylcholine acyl-alkyl<br>C40:6    | -0.261 | 0.3193 | 0.741937 | 0.01875932  |
| C5:1-DC               | Glutaconylcarnitine,<br>Mesaconylcarnitine | -0.271 | 0.3021 | -0.26351 | 0.409158971 |
| 2-Hydroxybutyric acid | 2-Hydroxybutyric acid                      | -0.323 | 0.219  | 0.250888 | 0.404894782 |
| Myoinositol           | Myoinositol                                | -0.386 | 0.1416 | 0.47233  | 0.144462991 |
| C16:1 -OH             | Hydroxyhexadecenoylcarnitine               | -0.447 | 0.0884 | 0.809254 | 0.093896414 |

\*Fold change was calculated as mean (log2 (obese)) – mean (log2 (control))



\*Univariate logistic regression of each Elanet-selected metabolite adjusted for maternal age, ethnicity, parity, and gravidity.

594

595

596

597

598

## 599 **Legends for figures**

600

601 Figure 1: Source of variation and accuracies of logistic regression models and important features selected  
602 by the metabolomics model. (A) ANOVA plot of clinical factors using the metabolites levels in cord blood  
603 samples. Averaged ANOVA F-statistics are calculated for potential confounding factors, including obesity,  
604 gravida, parity, paternal and maternal age and ethnicity. (B) Model accuracy represented by classification  
605 Receiver Operator Curves (ROCs). (C) The ranking of contributions (percentage) of selected metabolomics  
606 features in the model.

607

608

609

610 Figure 2: (A) Correlation coefficients among demographical/physiological factors and the metabolomics  
611 data. Blue colors indicates positive correlations and red indicated negative correlations. (B) Receiver  
612 Operator Curves (ROCs) of the combined model with metabolomics and physiological/demographic data.  
613 (C). The ranking of contributions (percentage) of selected features in the model (B).

614

615

616 Figure 3: Analysis of the 29 selected metabolites. (A) Heatmap of selected metabolites separated by  
617 maternal group. \* indicates metabolites that shows significant p-values ( $P < 0.05$ , t-test) individually. (B)  
618 Pathway analysis of the 29 metabolites. X-axis shows size of metabolomic pathway. Y-axis shows the  
619 adjusted p-value calculated from CPDB tool. The size of the nodes represents the size of metabolomic  
620 pathway (number of metabolites involved in each pathway). The color of the nodes represents the source  
621 of these pathways.

622

623

624 Figure 4: Violin plot of 2-hydroxy-3-methylbutyric acid among 3 ethnic groups in the discovery cohort.  
625 Association between 2-hydroxy-3-methylbutyric acid and the ethnicity in (A) normal (n=29) and (B) obese  
626 (n=28) subjects.

627

628 Figure 5: Validation with another cohort. (A) Accuracy on classifying cases vs controls in the validation  
629 cohort, using the model built on the discovery cohort as shown in Fig 2(B). (B-C) violin plots of 2-hydroxy-  
630 3-methylbutyric acid in NHPI vs (Asians/Caucasians). Asians (n=2) and Caucasians (n=3) were combined,  
631 as the number of patients of these ethnicities in the obese group is small. (A) normal (n=18) and (B) obese  
632 (n=12) subjects are displayed.

633

634

## 635 **Supplementary Figures**

636

637 **Supplementary Figure 1:** Discrimination of obese and normal groups by Partial Least Squares (PLS)  
638 method. (A) Discriminant analysis score plot for obese cases (Green) and normal (Red). (B) The accuracy  
639 of the 10 fold cross-validation of the PLS-DA model. R2 is the sum of squares captured by the model; Q2  
640 is the cross-validation of R2.

641

642 **Supplementary Figure 2:** Selection of metabolites using elastic net regularization. **(A)** Tuning alpha  
643 parameter, the parameter representing the degree of mixing between lasso and the ridge regularization.  
644 Y-axis is the root mean square error of the 10-fold cross-validation. X-axis is the range of alpha values,  
645 with the optimal alpha =0.22. **(B)** Tuning lambda, the parameter controlling the shrunk rate of coefficients  
646 in the linear model. Y-axis is the misclassification error of the 10 fold cross validation. X-axis is the range  
647 of lambda, with the optimal lambda=0.008. **(C)** The shrinkage coefficients of the metabolites using tuned  
648 alpha and lambda.

649

650

651

652 **Supplementary Figure 3:** Accuracies of logistic regression models and important features selected by the  
653 clinical model. **(A)** Model accuracy represented by classification Receiver Operator Curves (ROCs). **(B)**  
654 The ranking of contributions (percentage) of selected clinical features in the model.

655

656

657

658

659

660

661

662

663

664

665

666

667

668

669

670

671

672

673

674

675

## Sources of variation

A

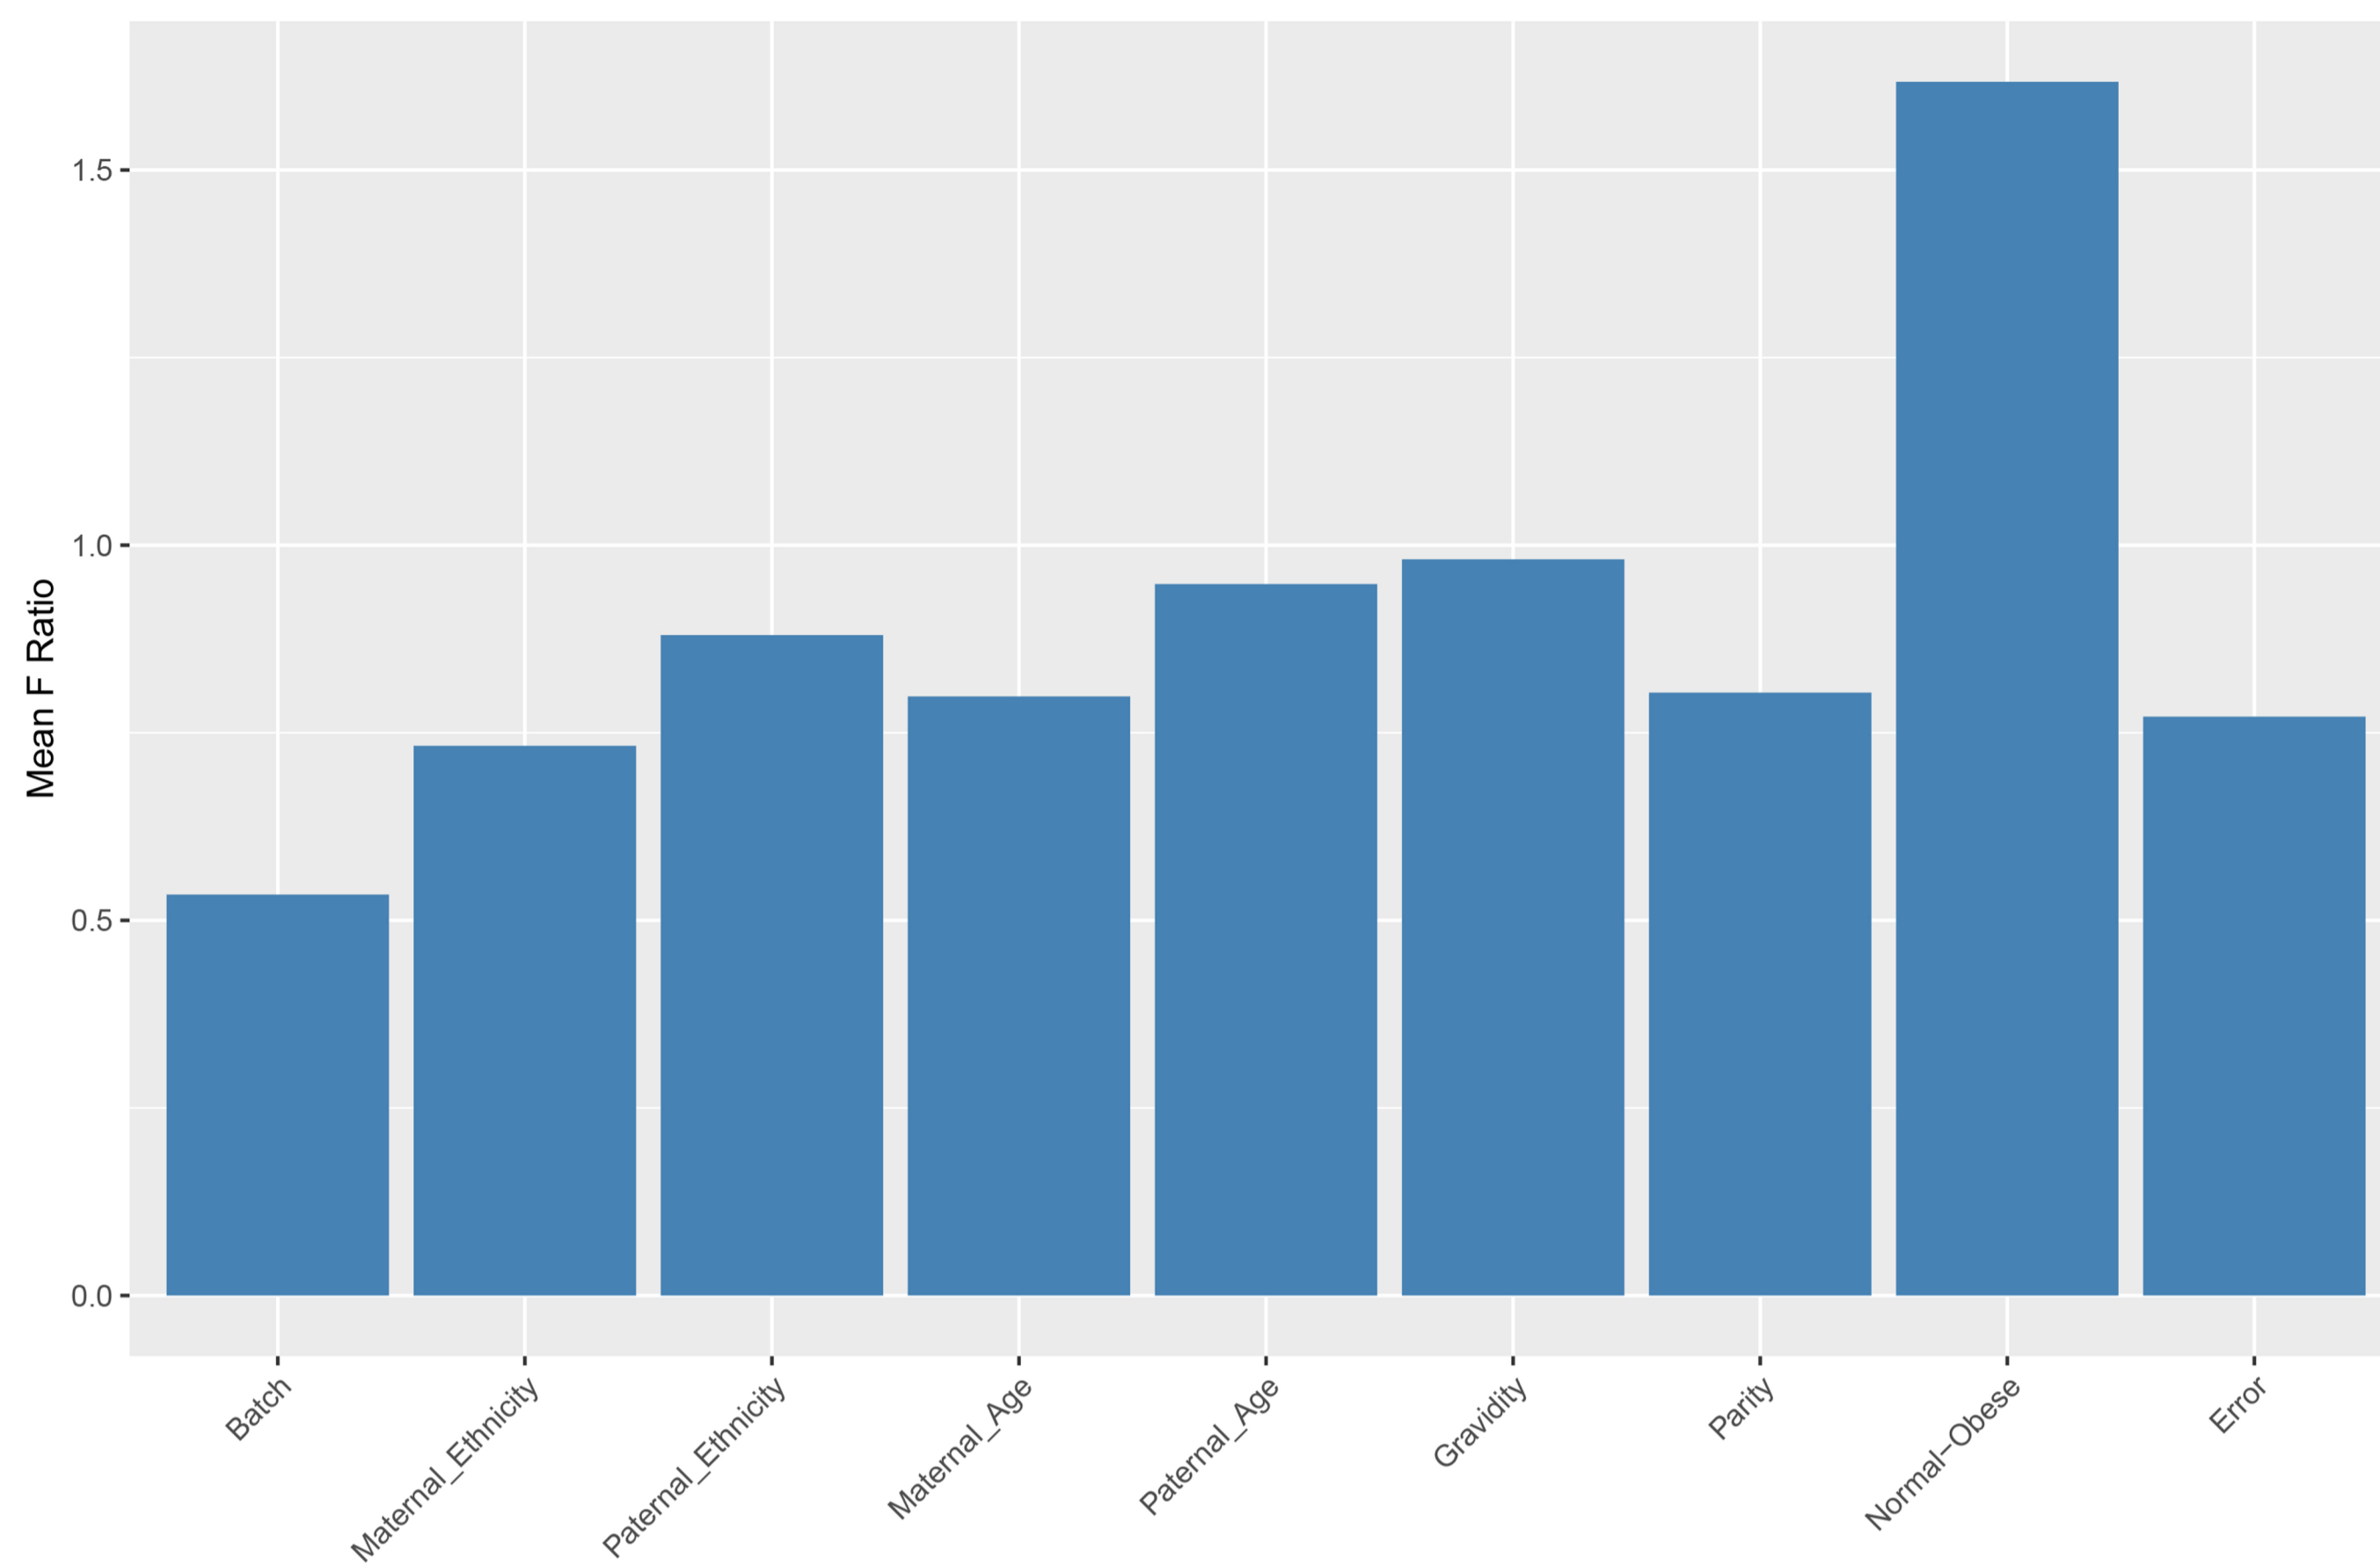

B

bioRxiv preprint doi: <https://doi.org/10.1101/264374>; this version posted May 13, 2019. The copyright holder for this preprint (which was not certified by peer review) is the author/funder, who has granted bioRxiv a license to display the preprint in perpetuity. It is made available under aCC-BY 4.0 International license.

## Metabolites selected by Elastic net

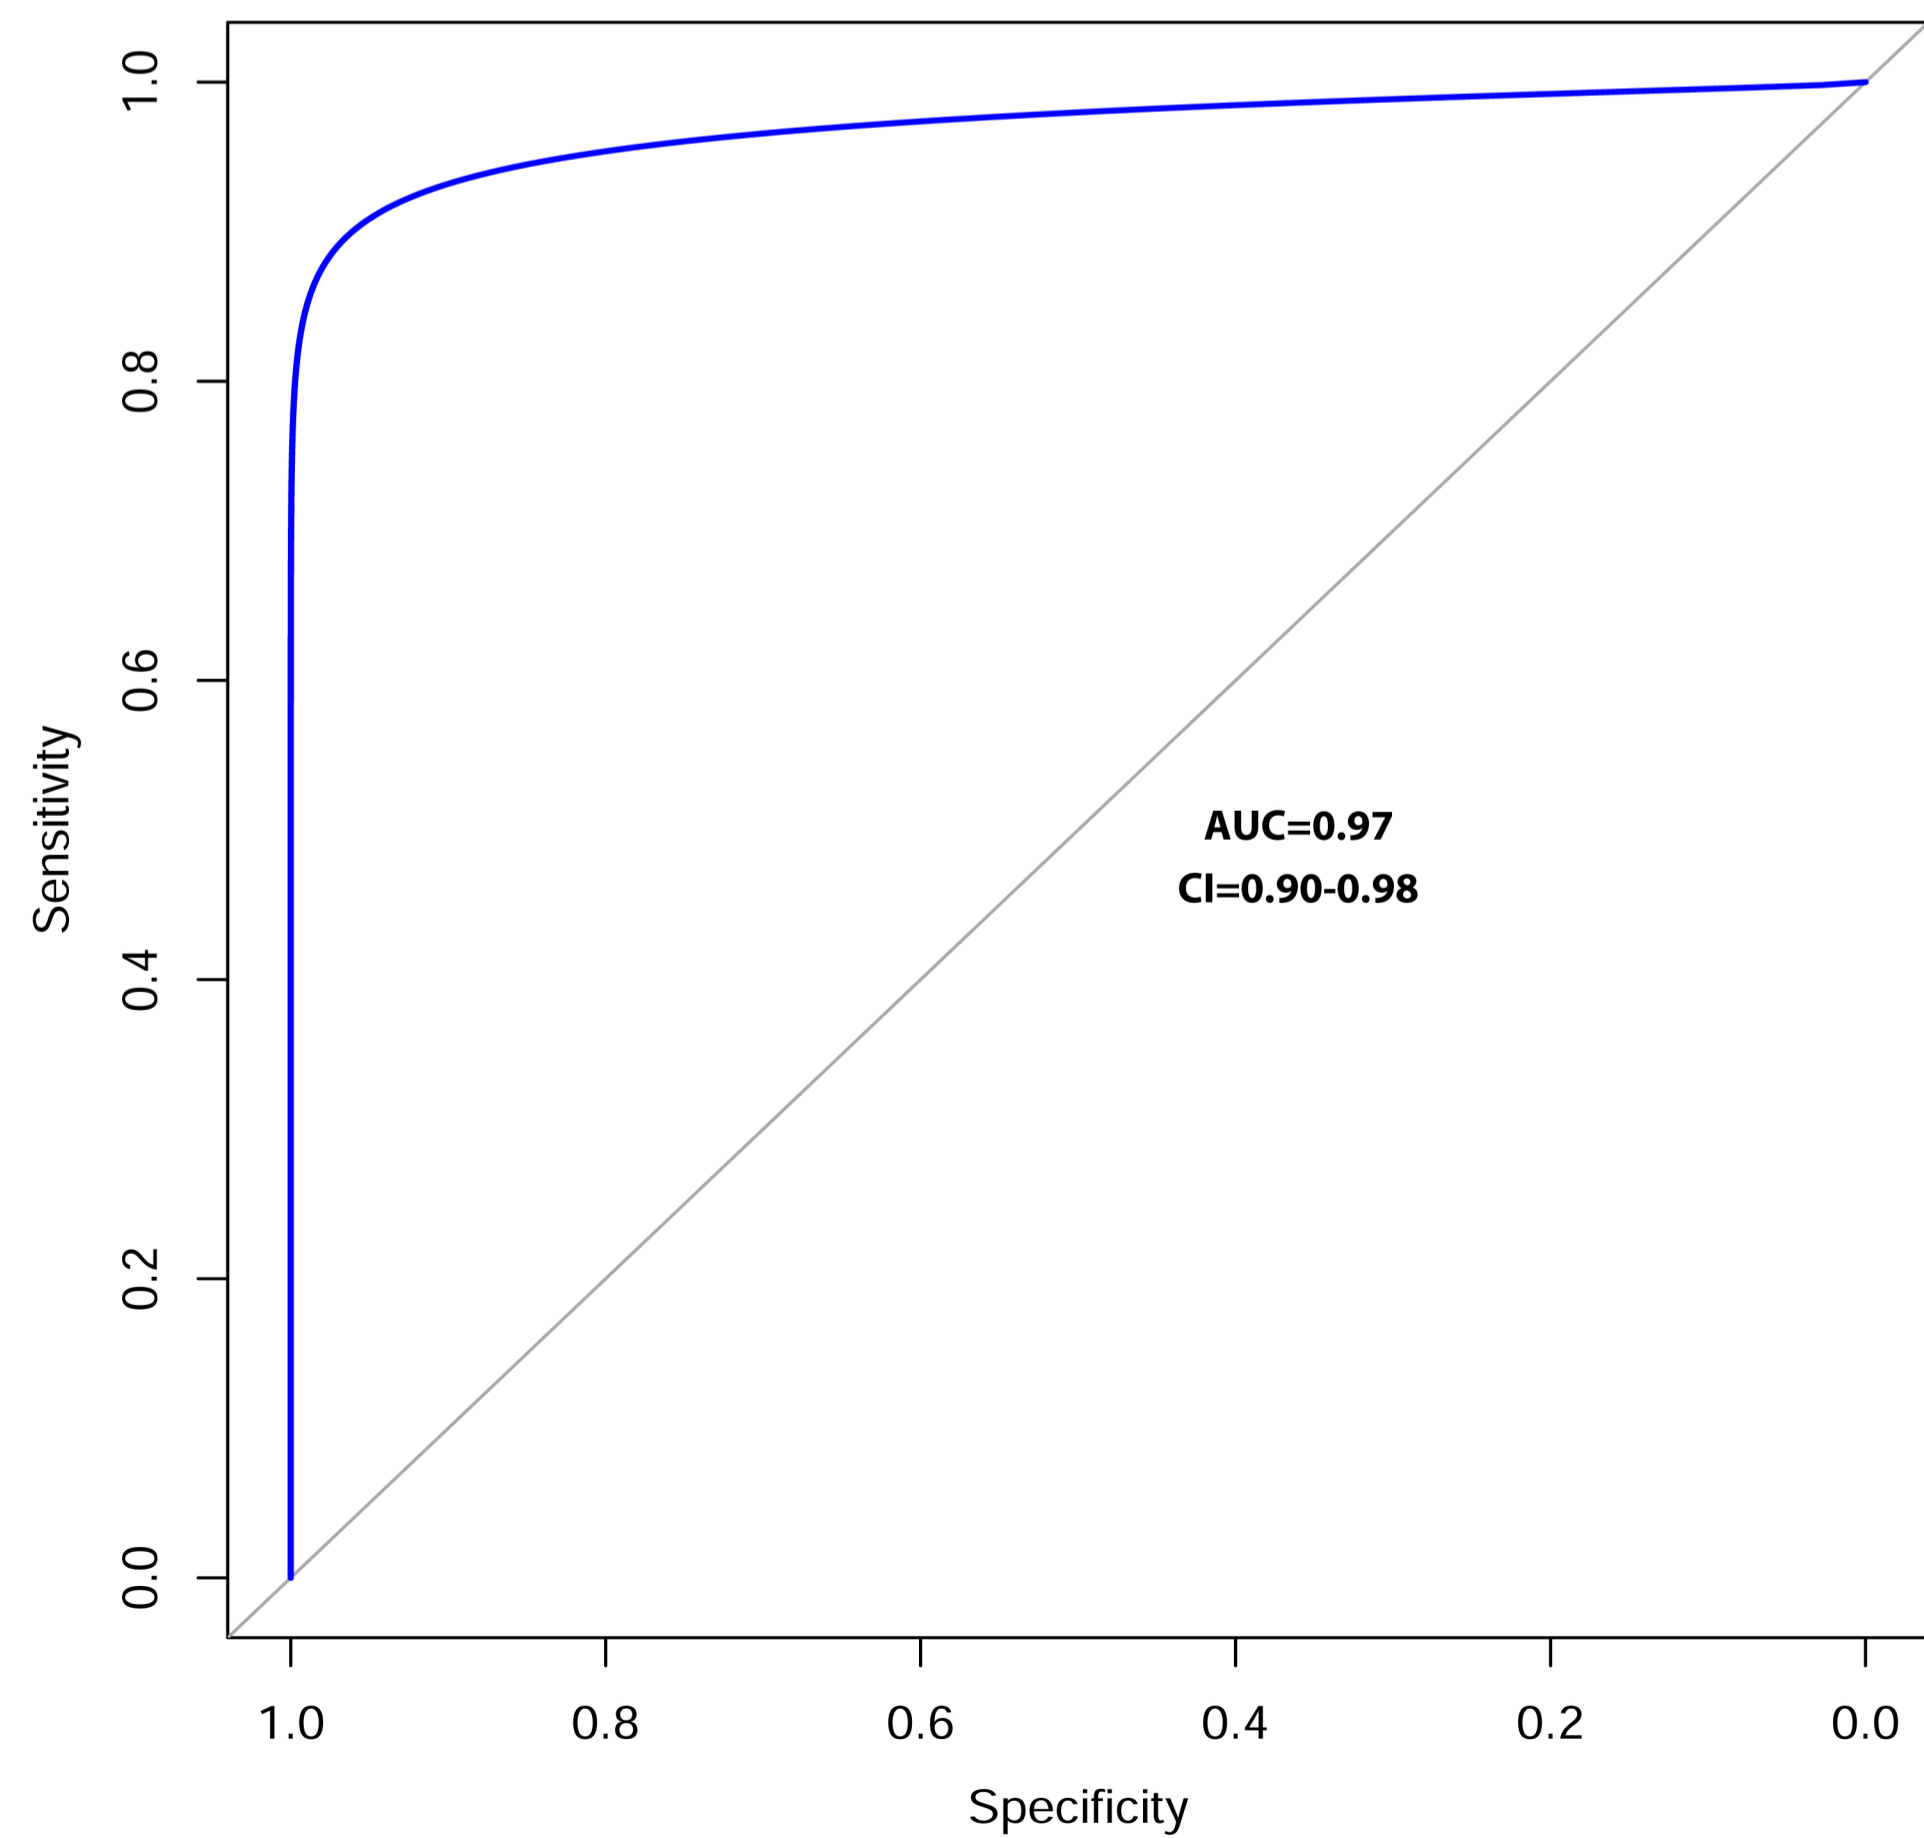

C

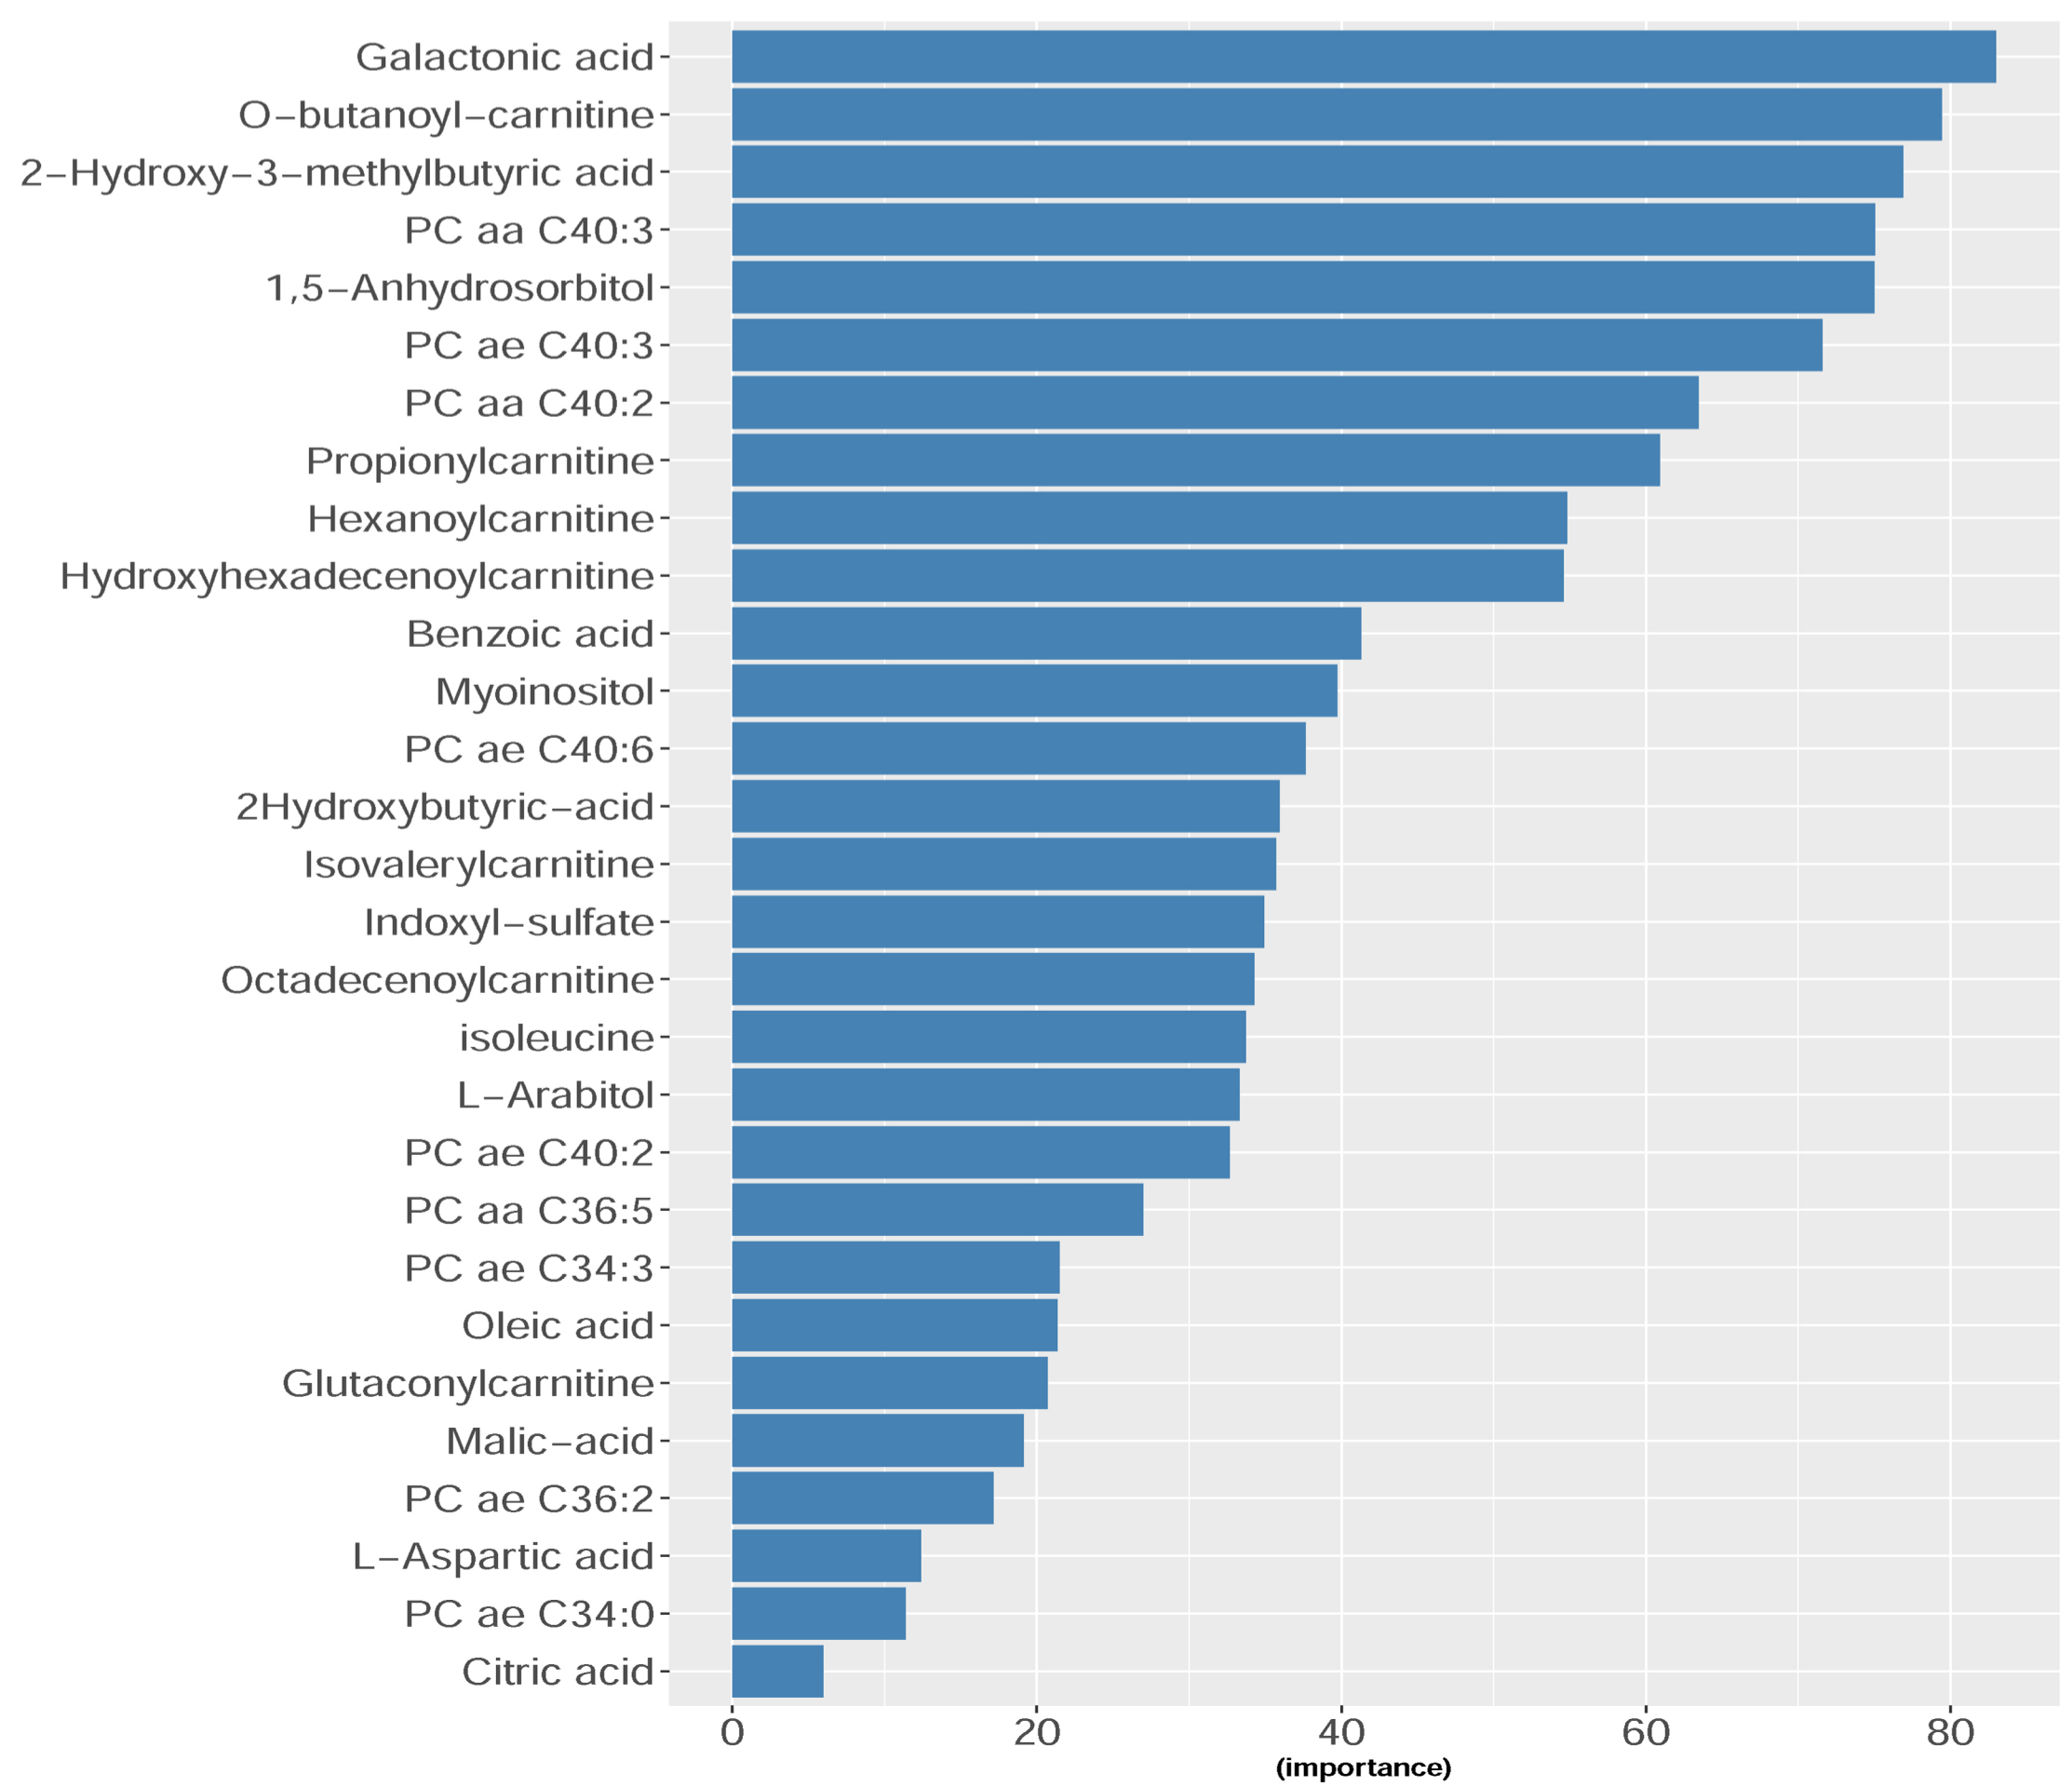

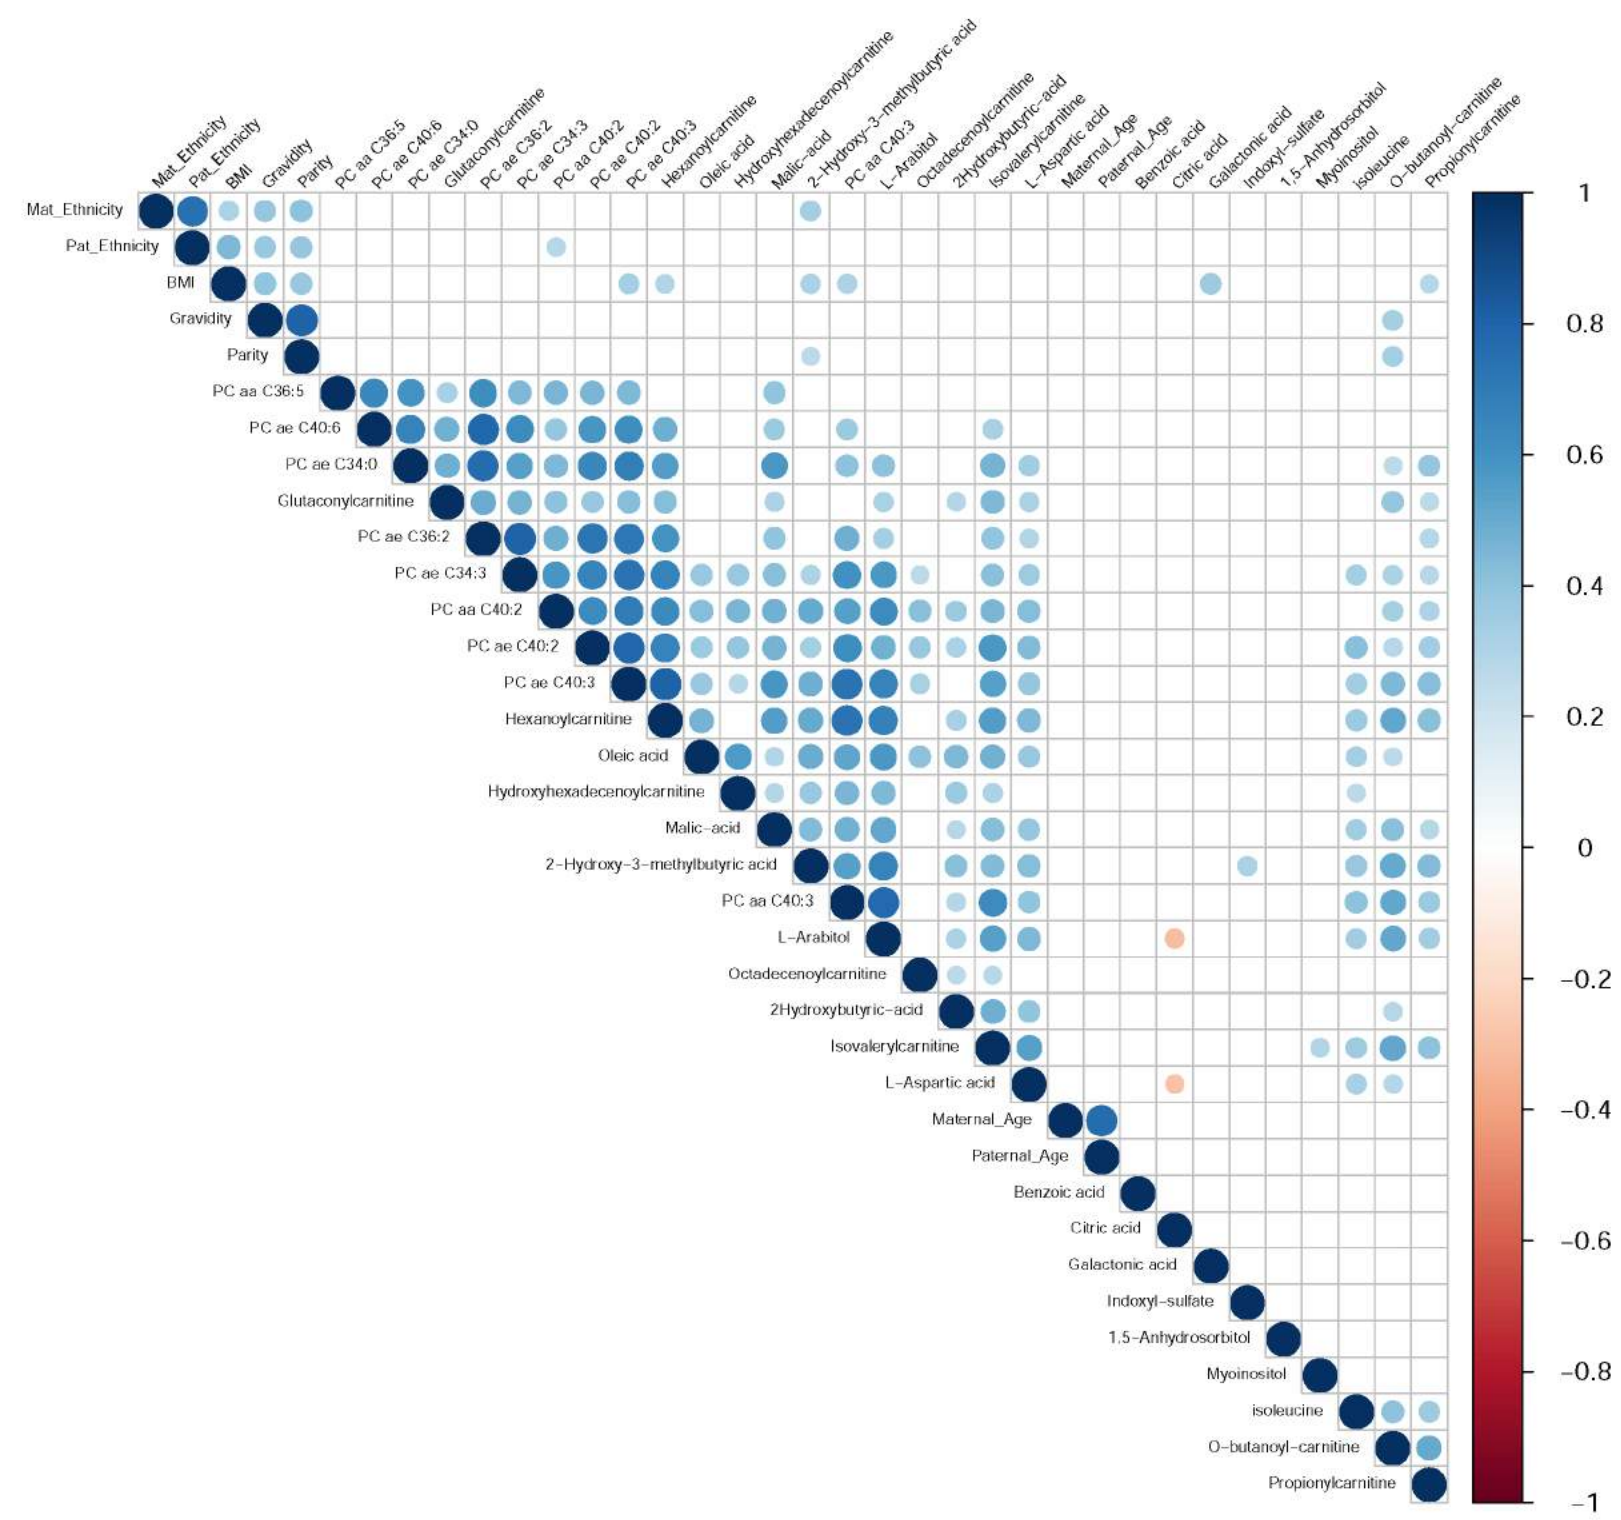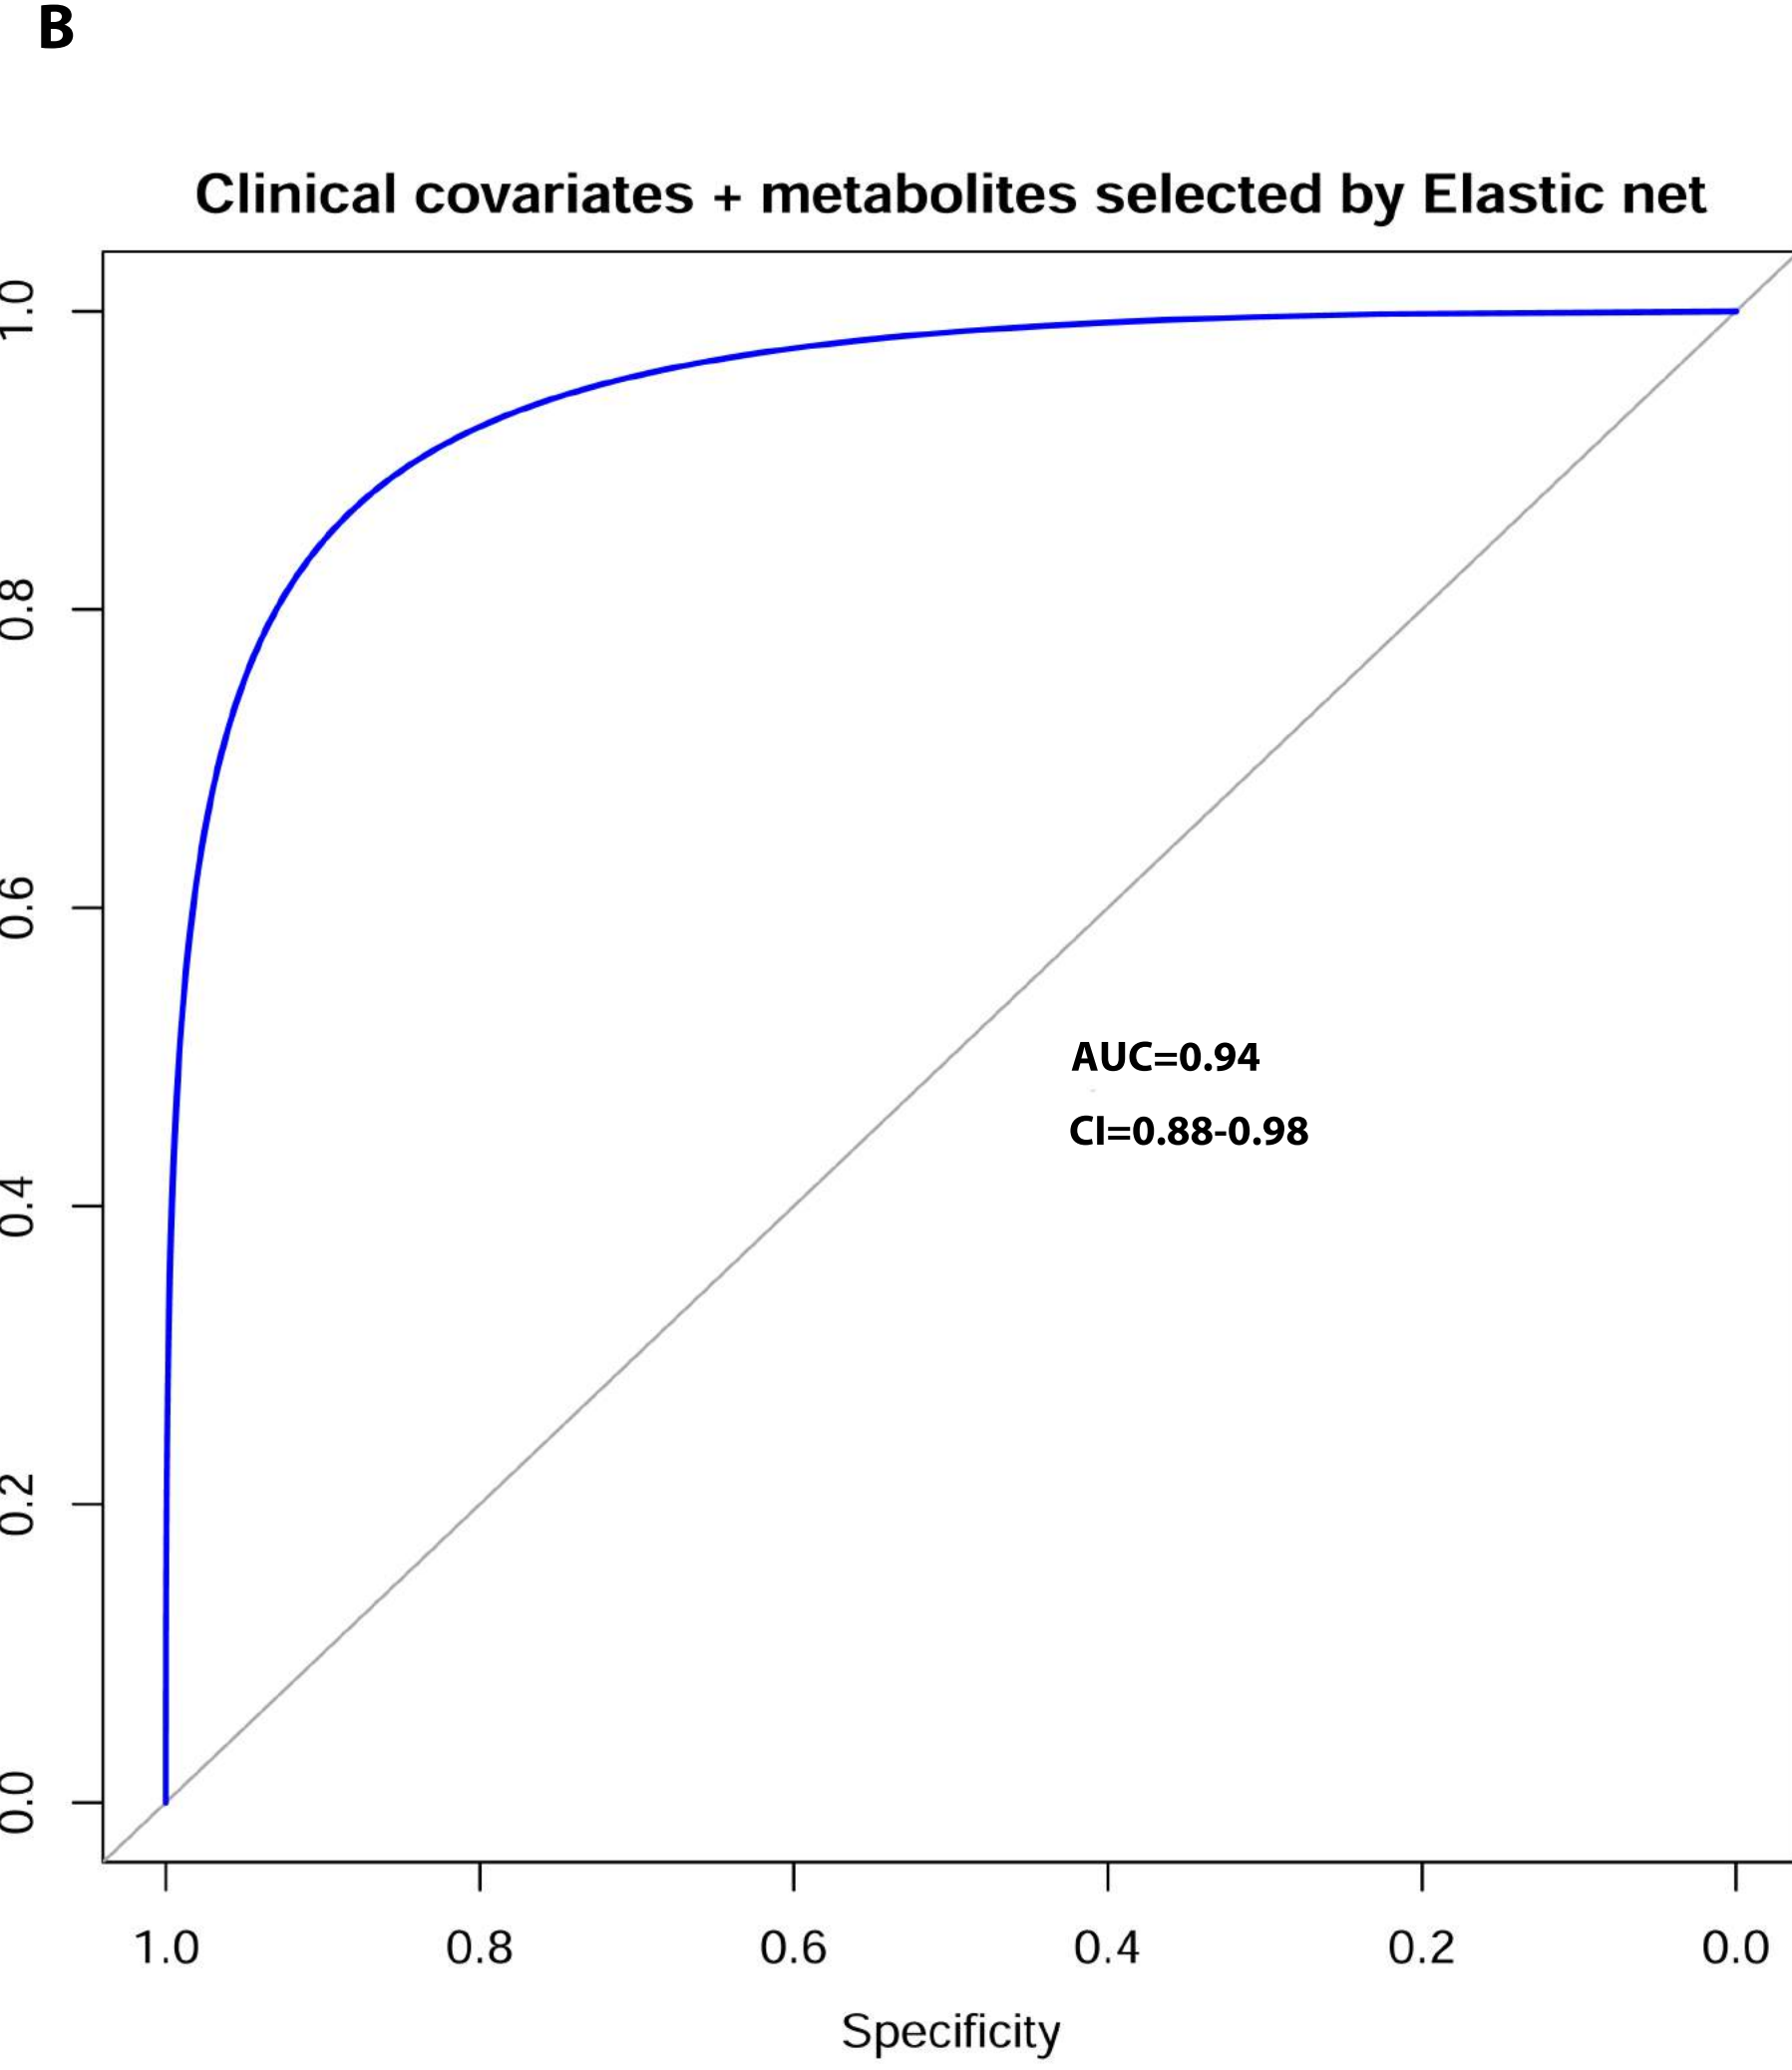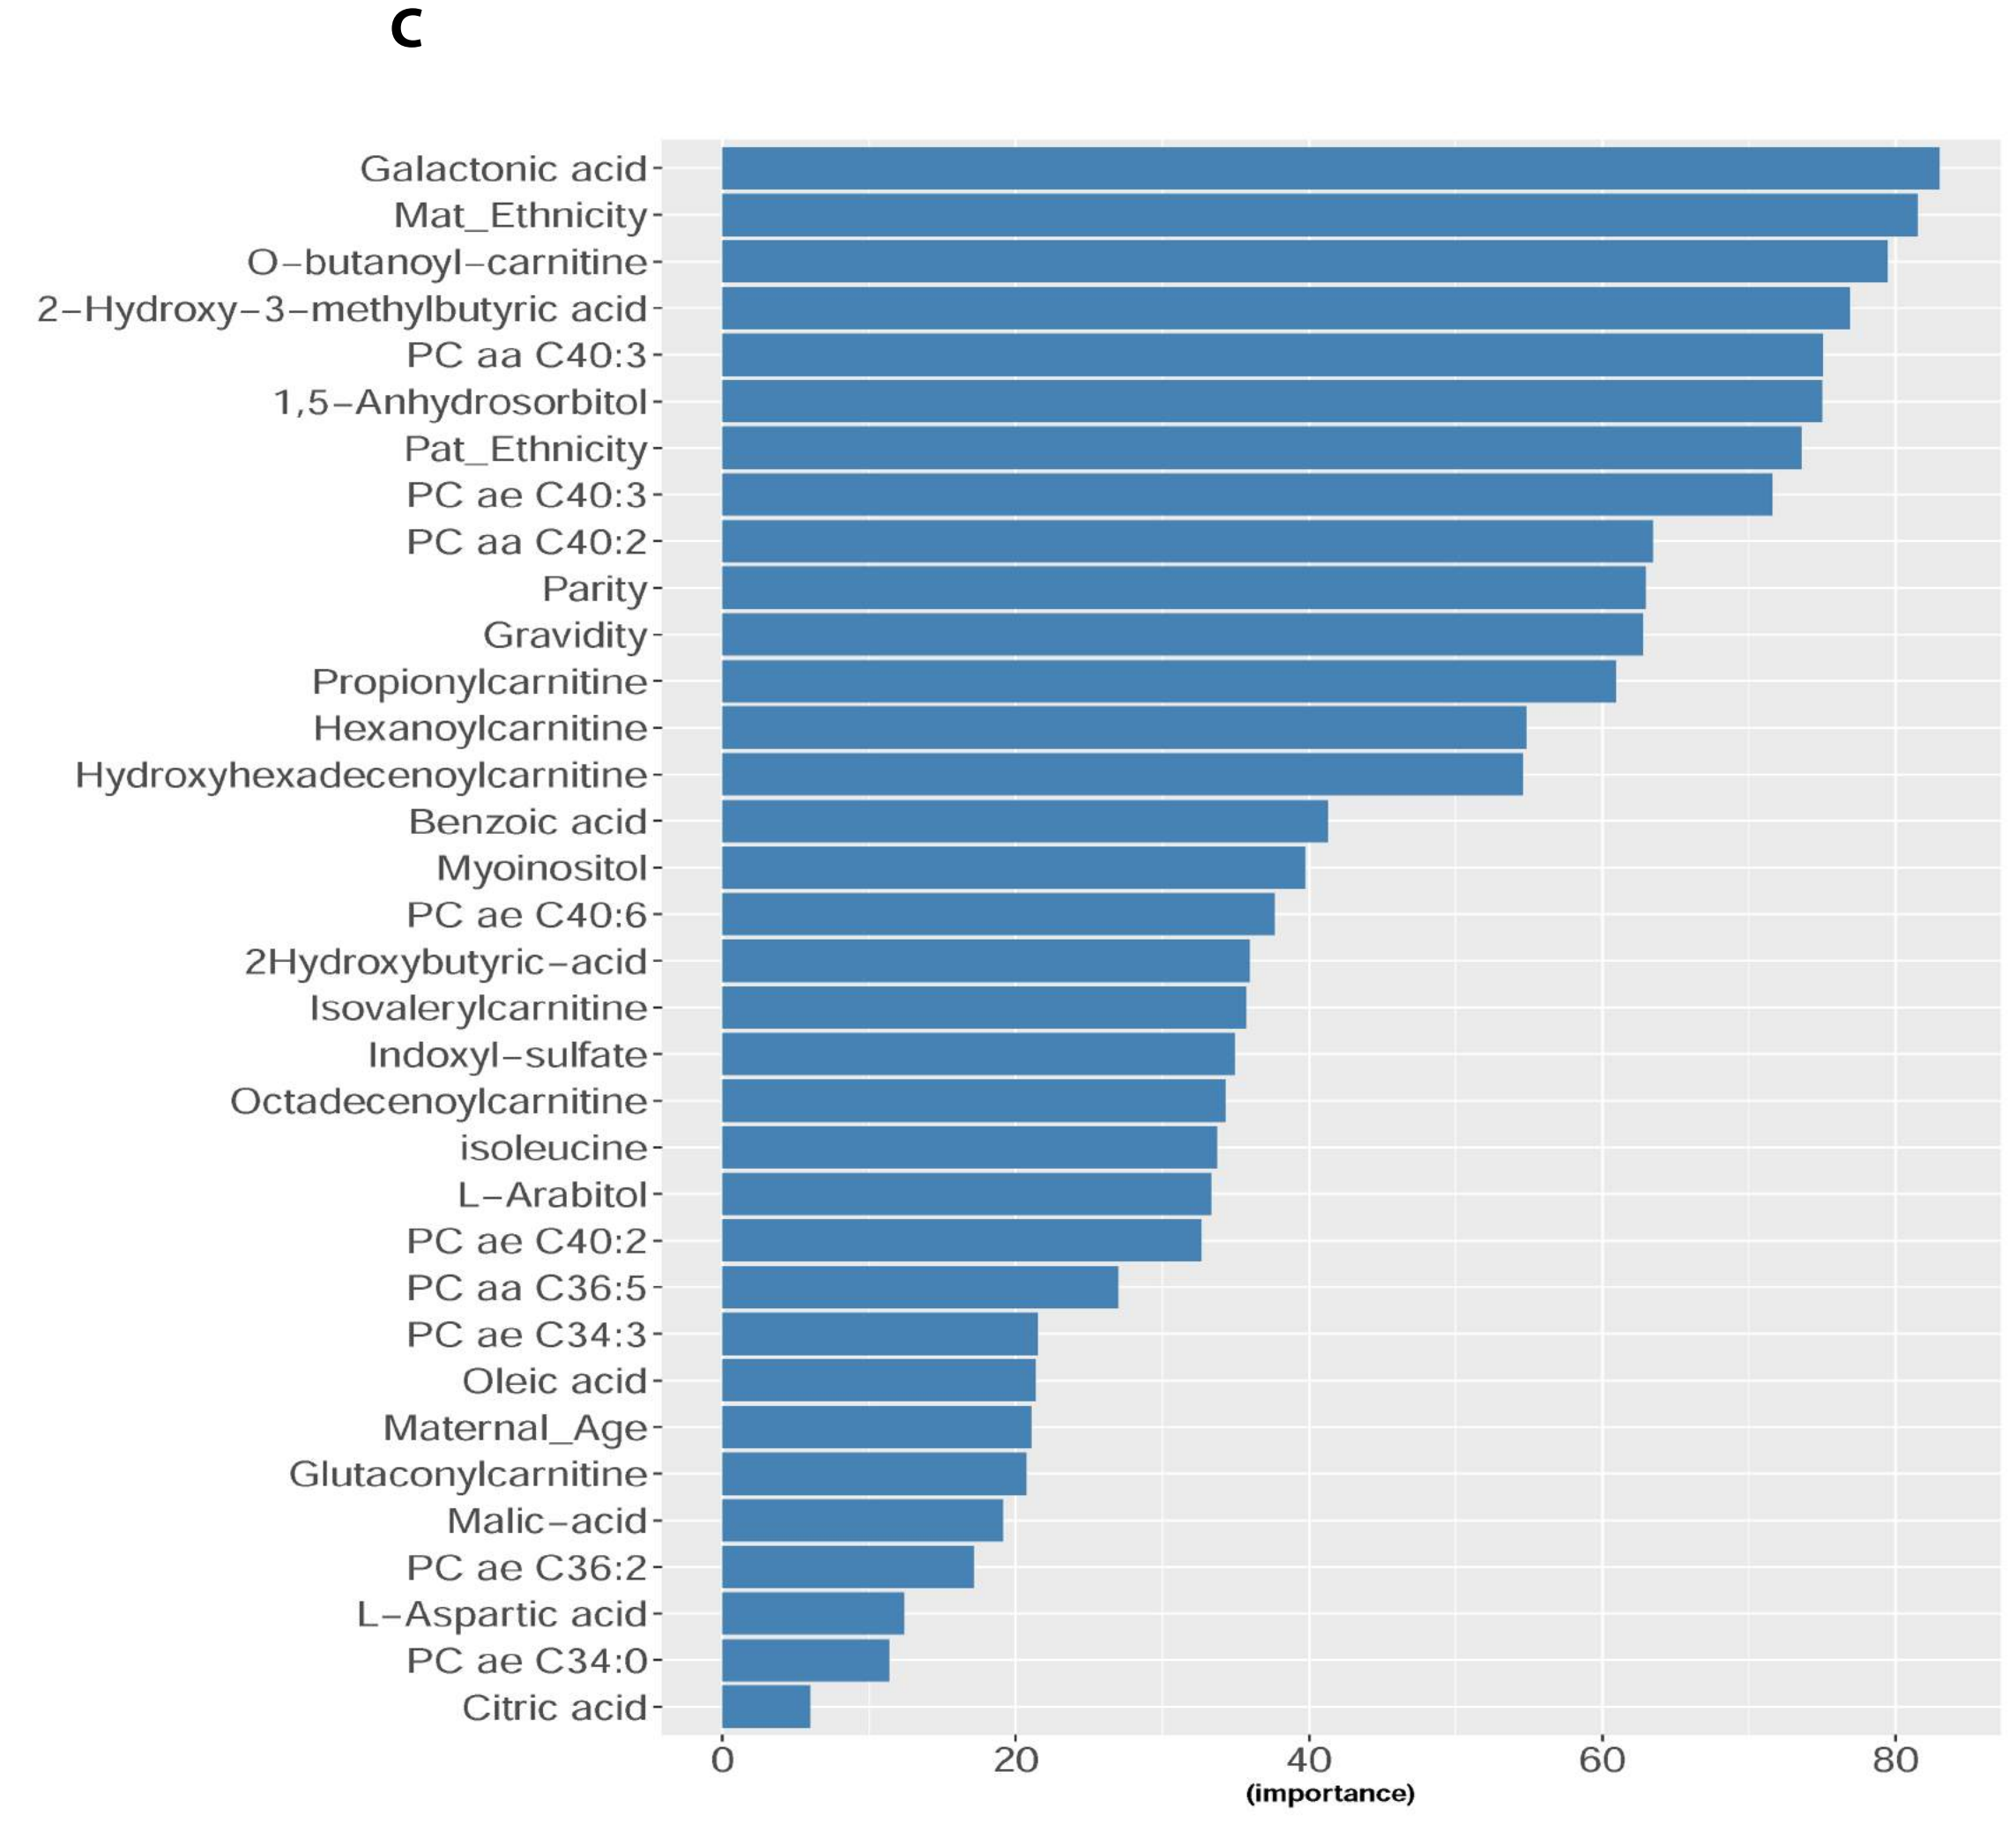

A

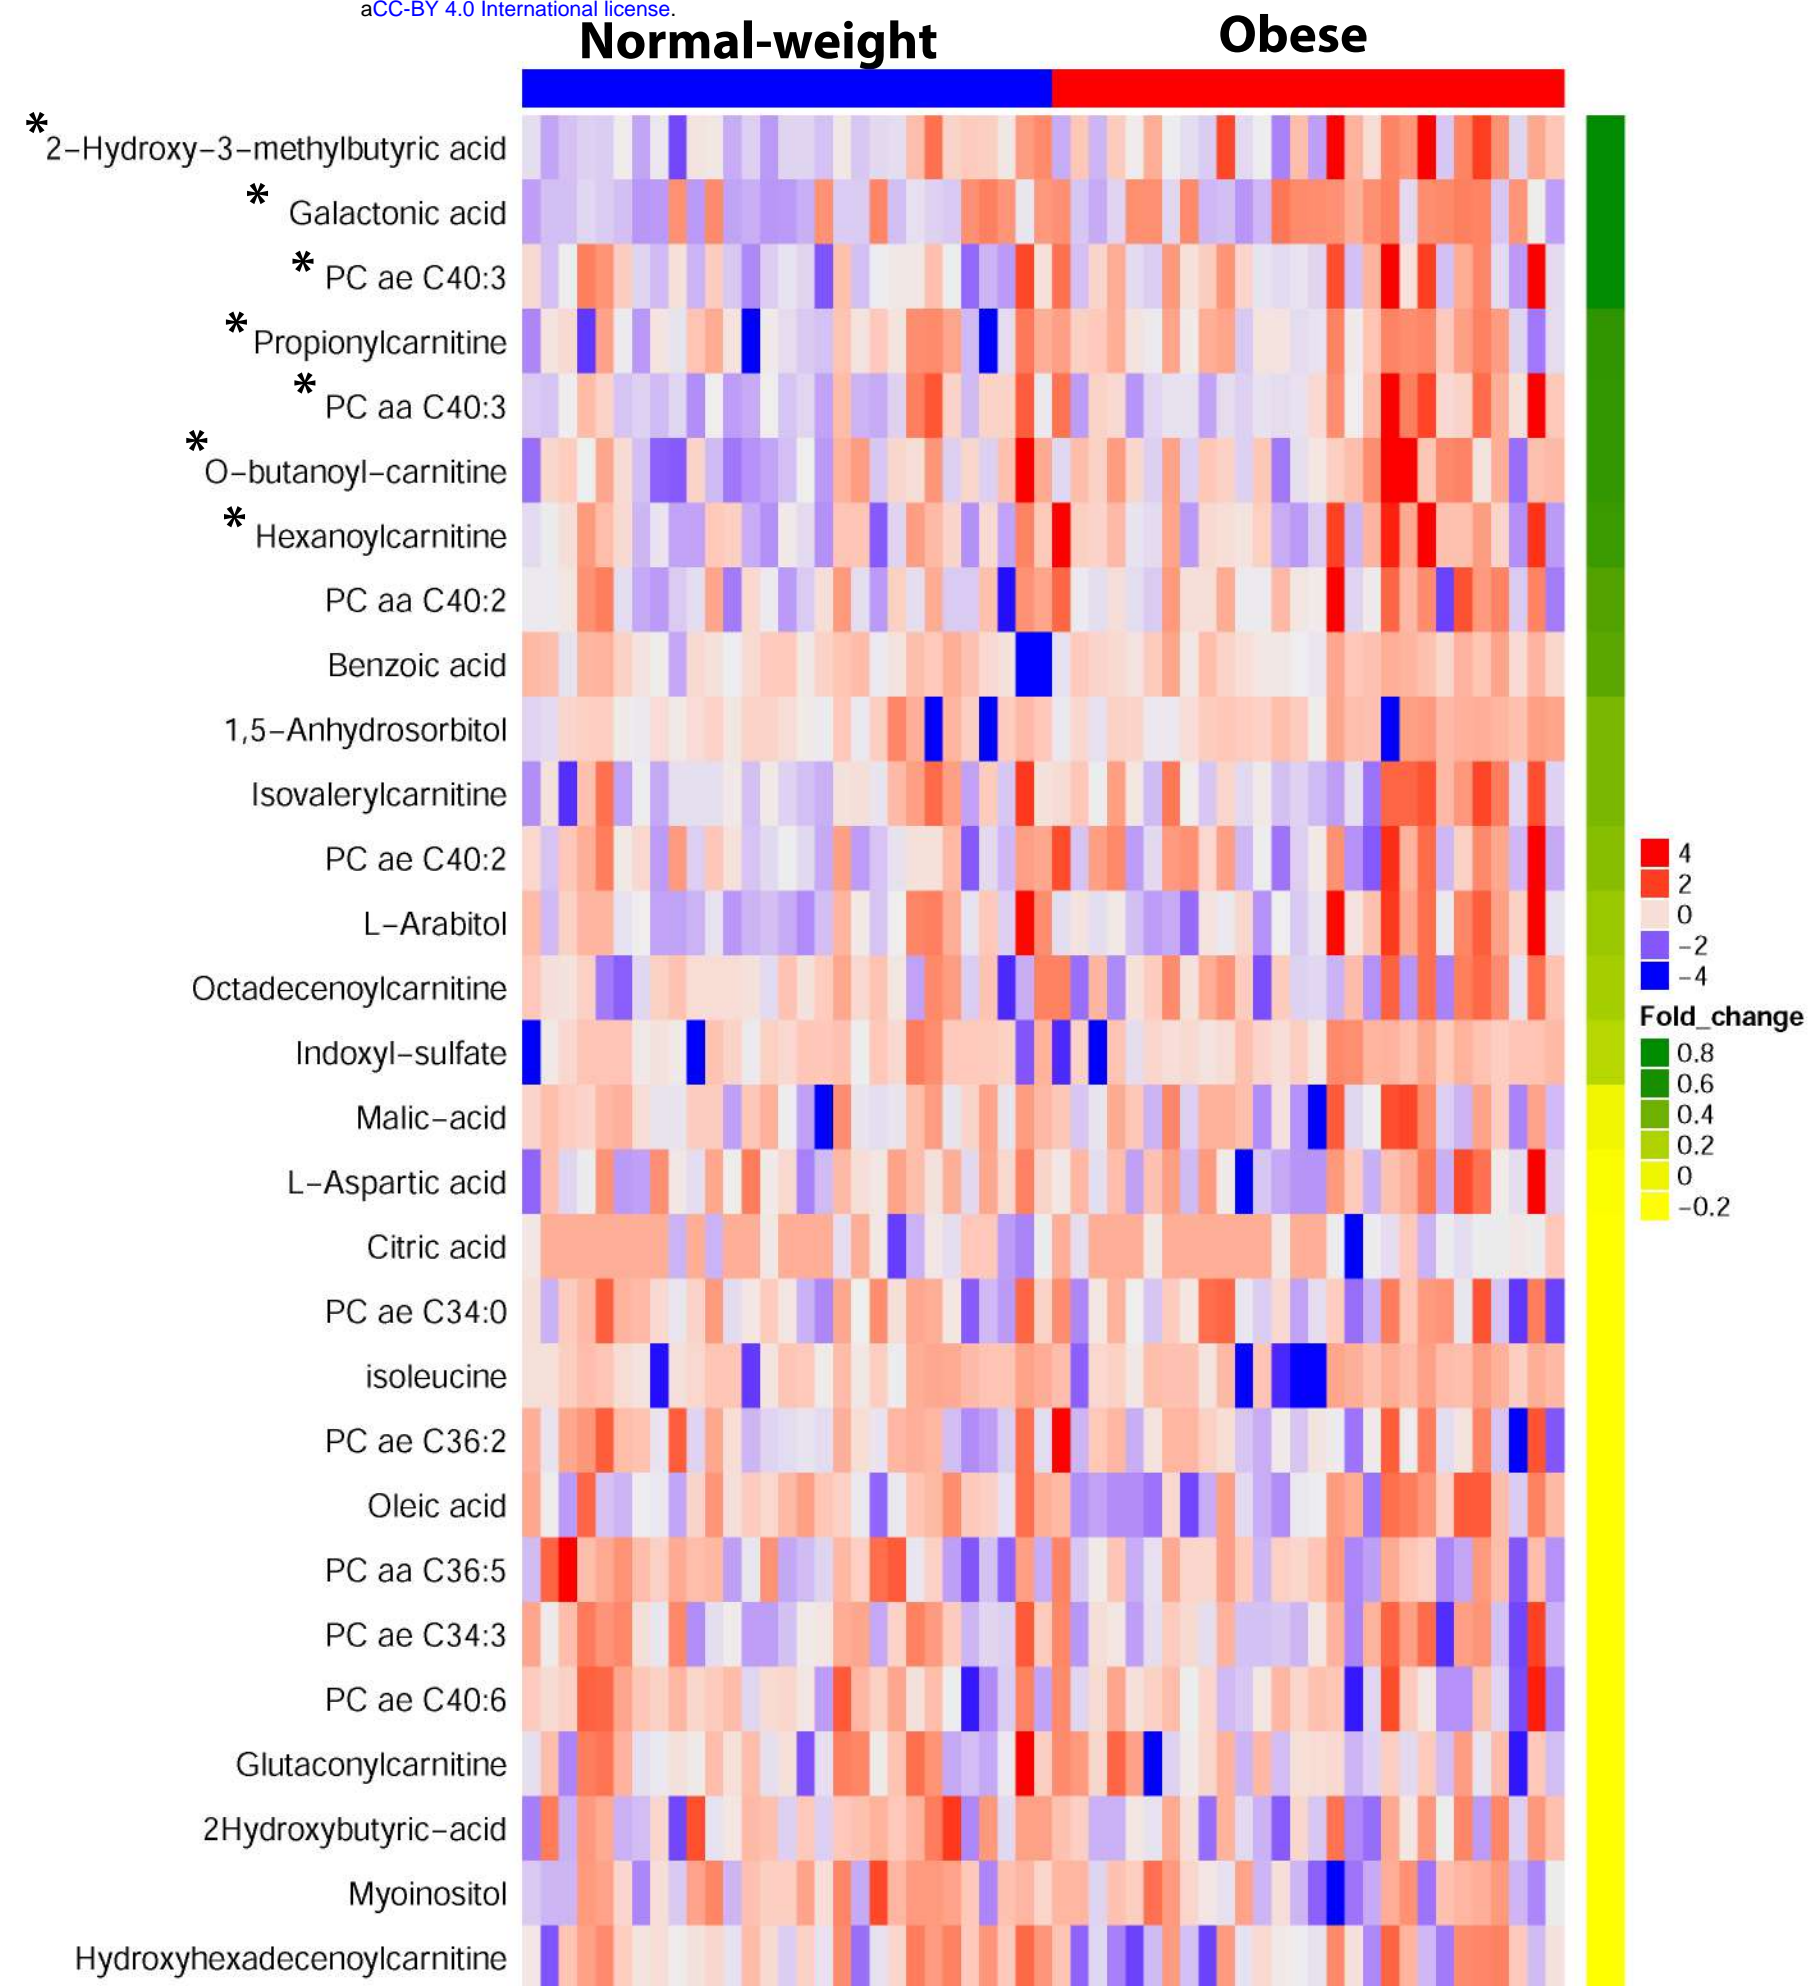

B

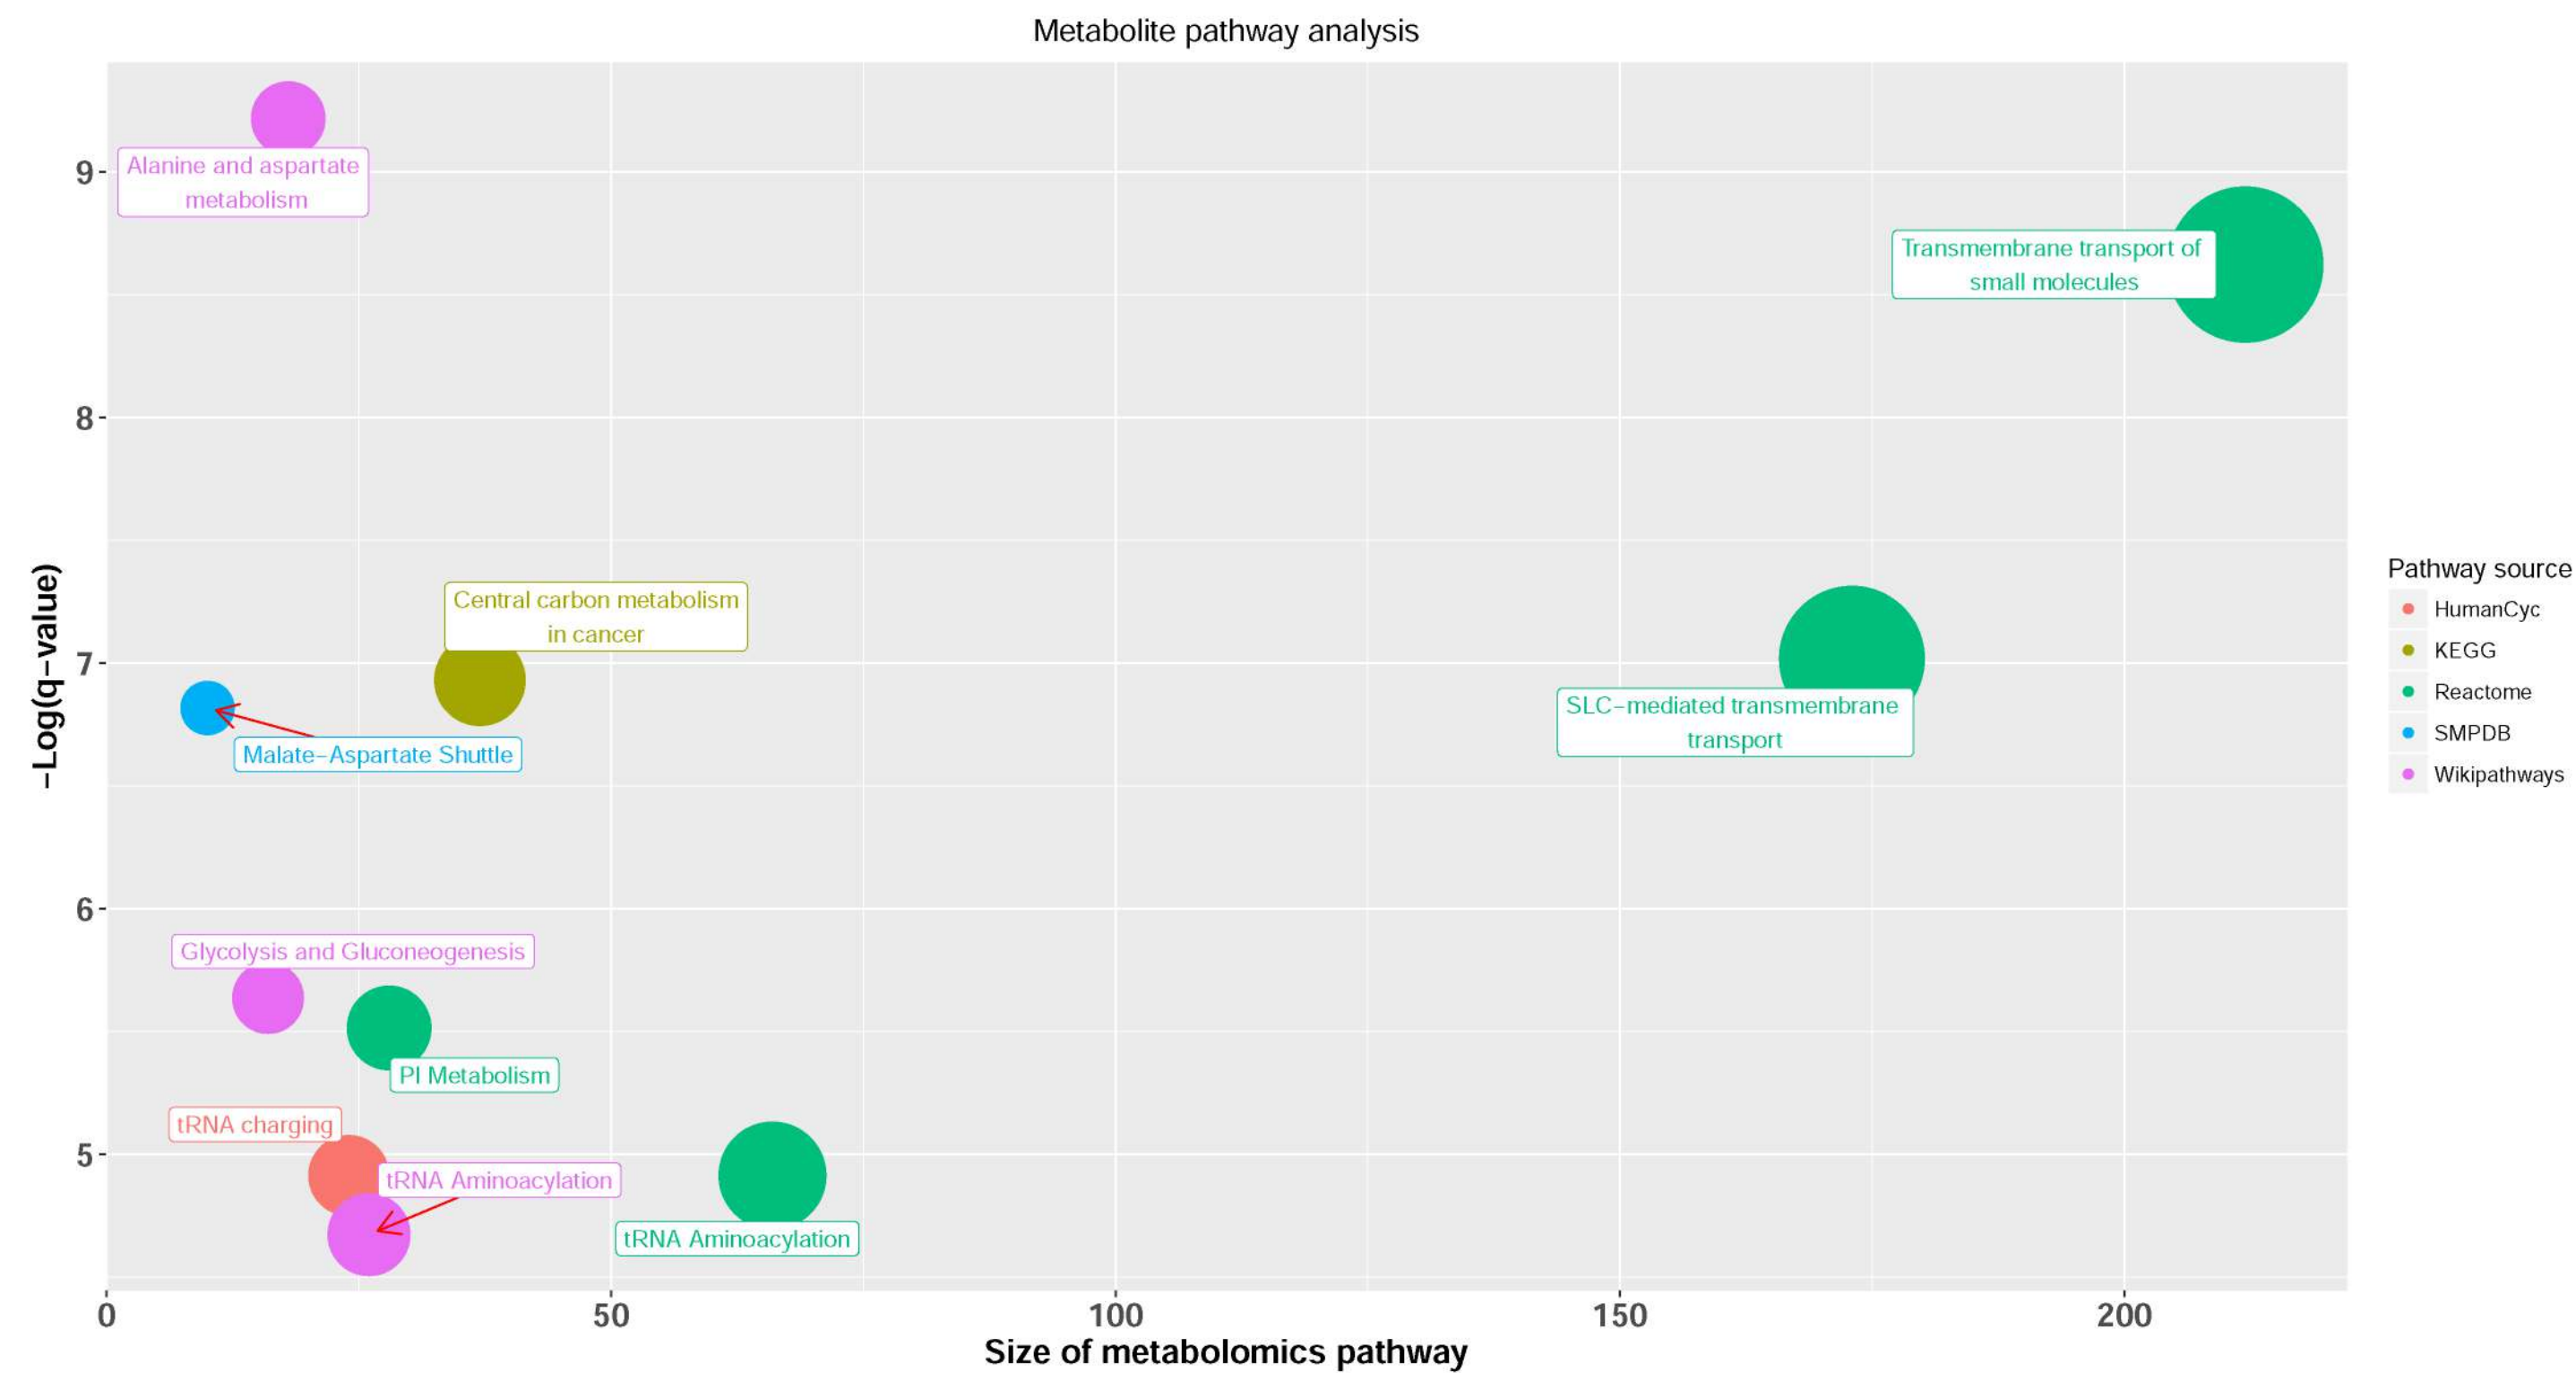





**A**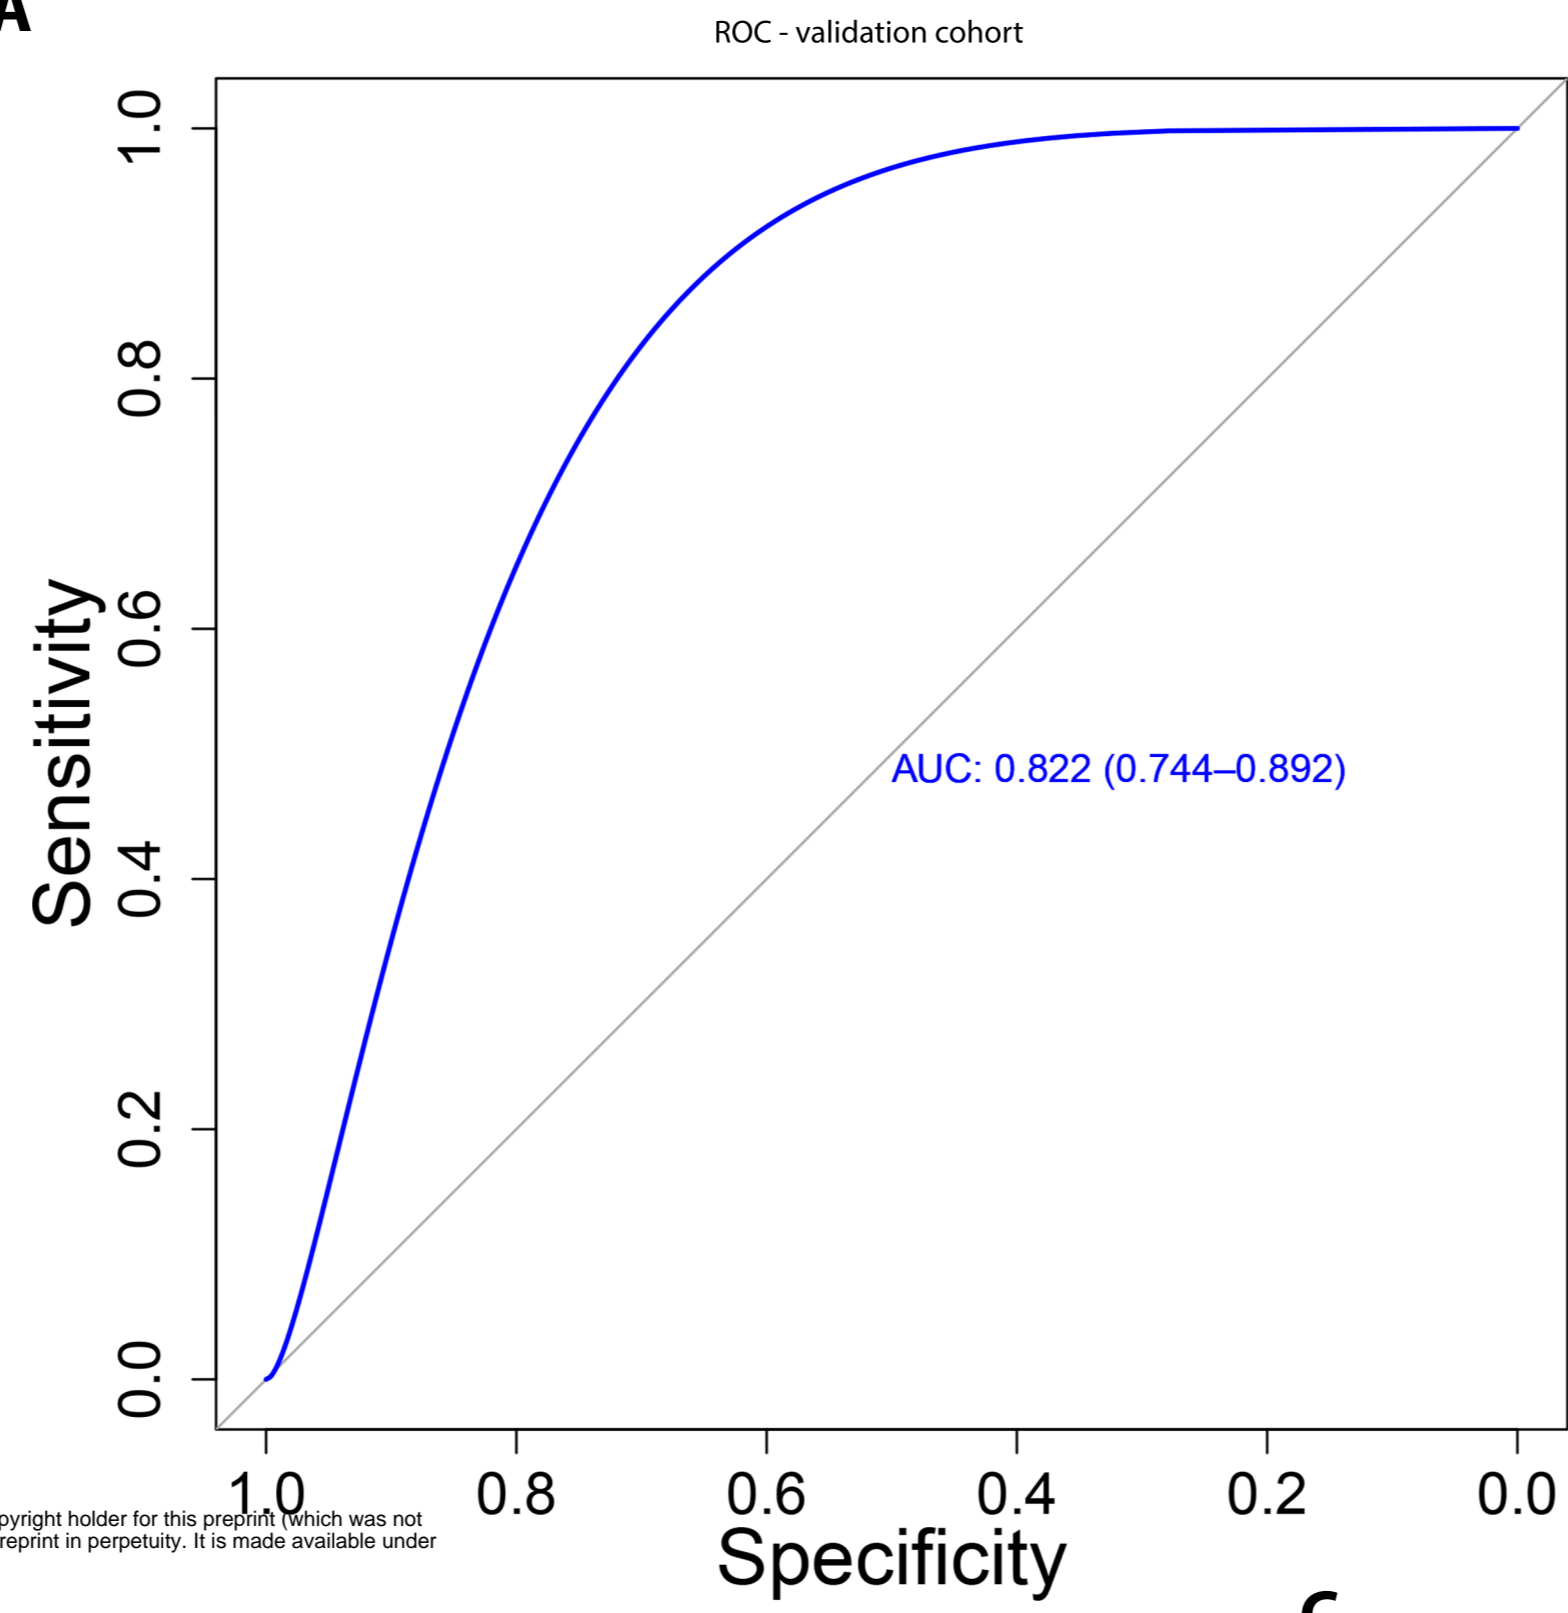

bioRxiv preprint doi: <https://doi.org/10.1101/264374>; this version posted May 13, 2019. The copyright holder for this preprint (which was not certified by peer review) is the author/funder, who has granted bioRxiv a license to display the preprint in perpetuity. It is made available under aCC-BY 4.0 International license.

**B**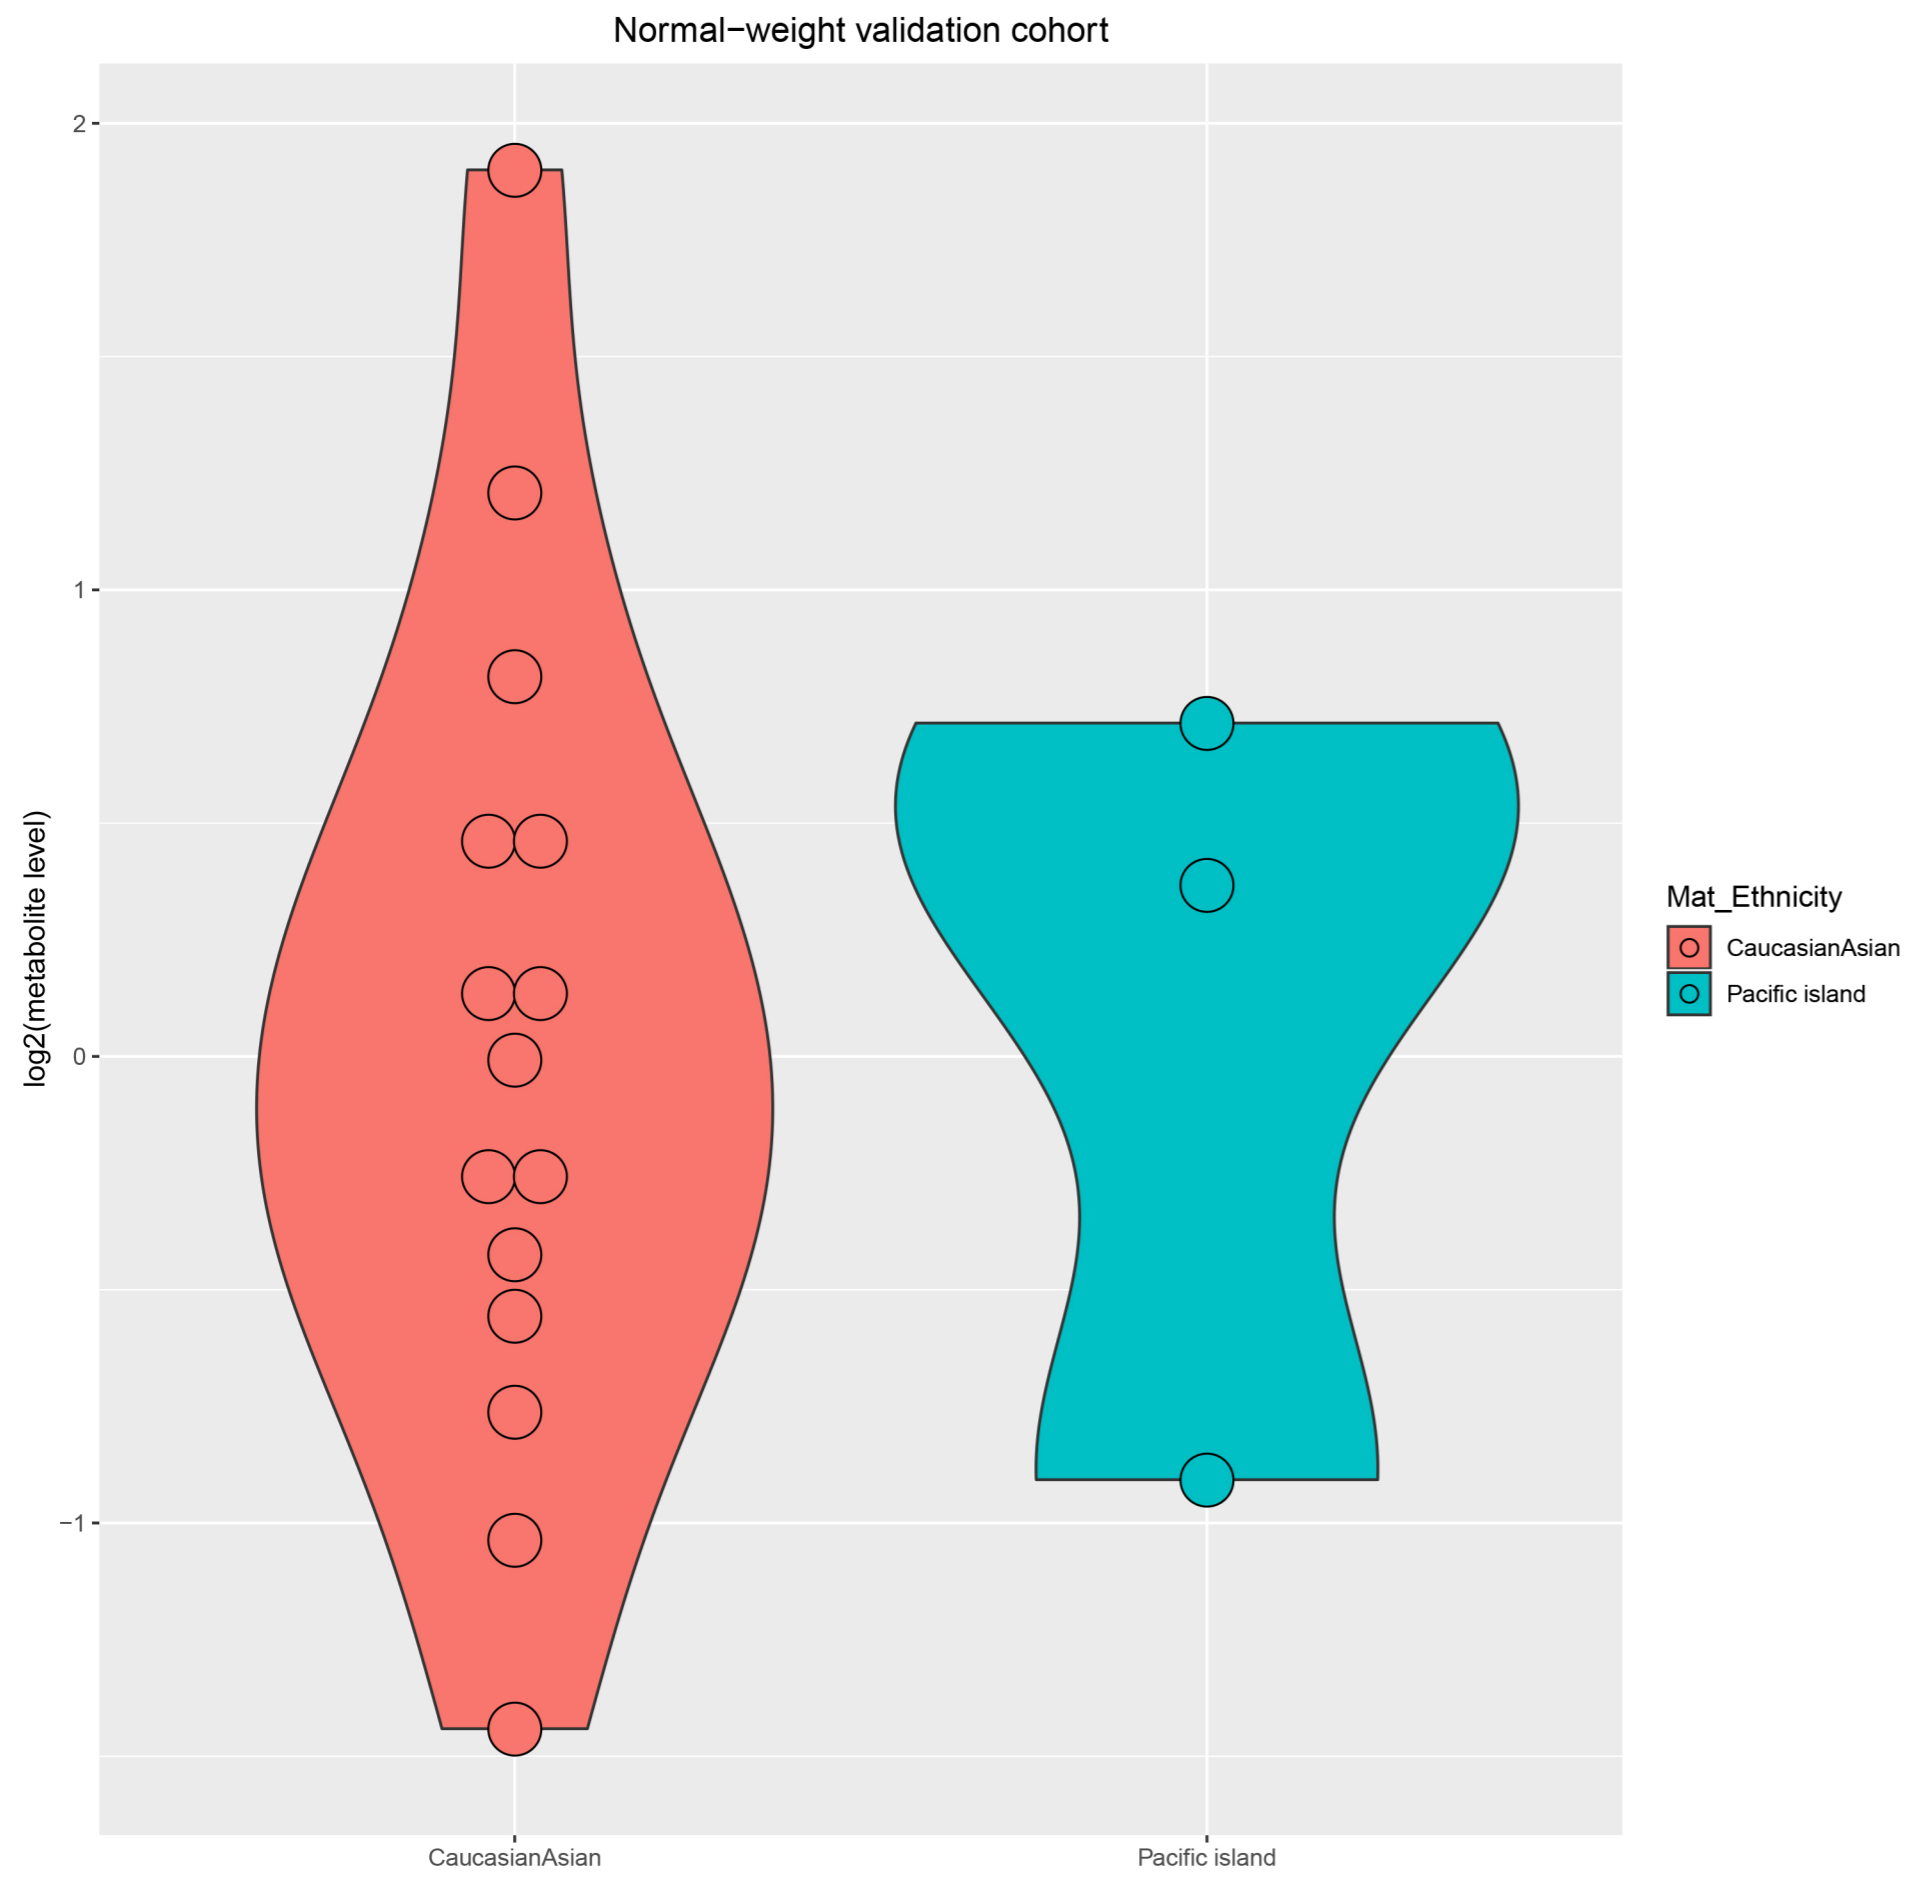**C**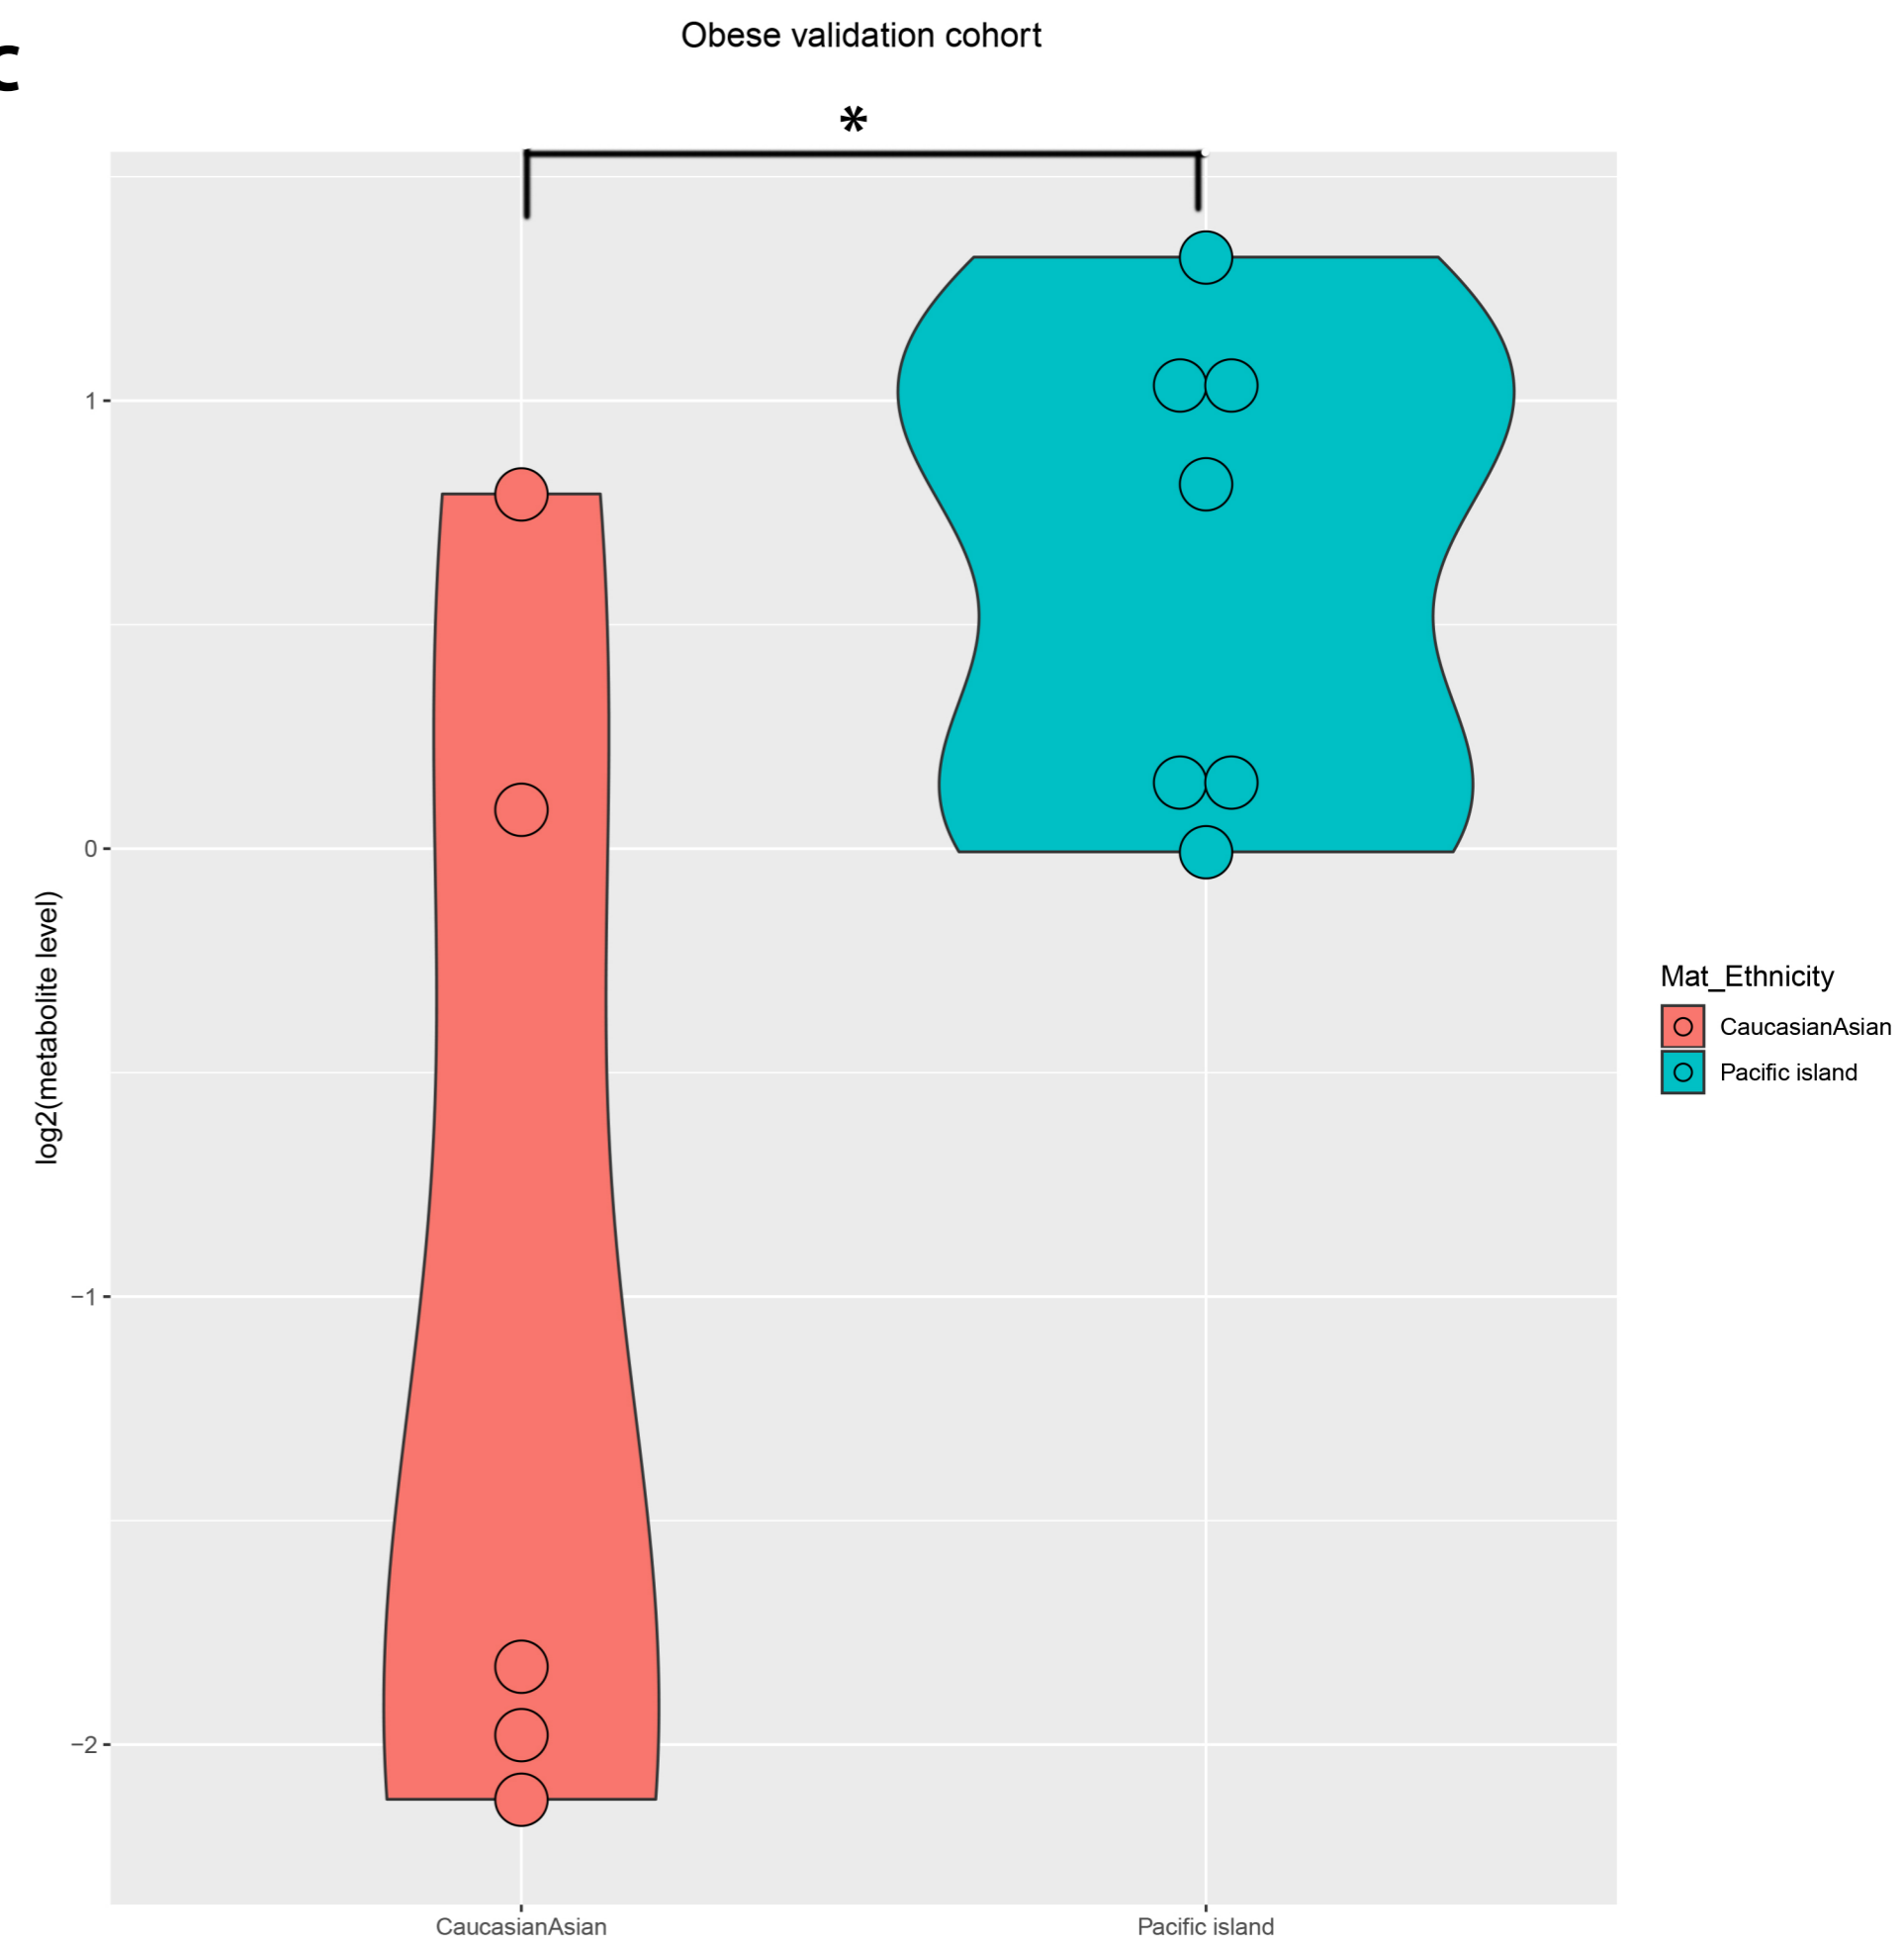

Source: https://www.biorxiv.org/content/10.1101/264374v3.full.pdf
