# Supplementary material for: Pre-pregnant obesity of mothers in a multi-ethnic cohort is associated with cord blood metabolomic changes in offspring
Source: bioRxiv or medRxiv preprint supplement (doi:10.1101/264374), 2019-12-25

**A**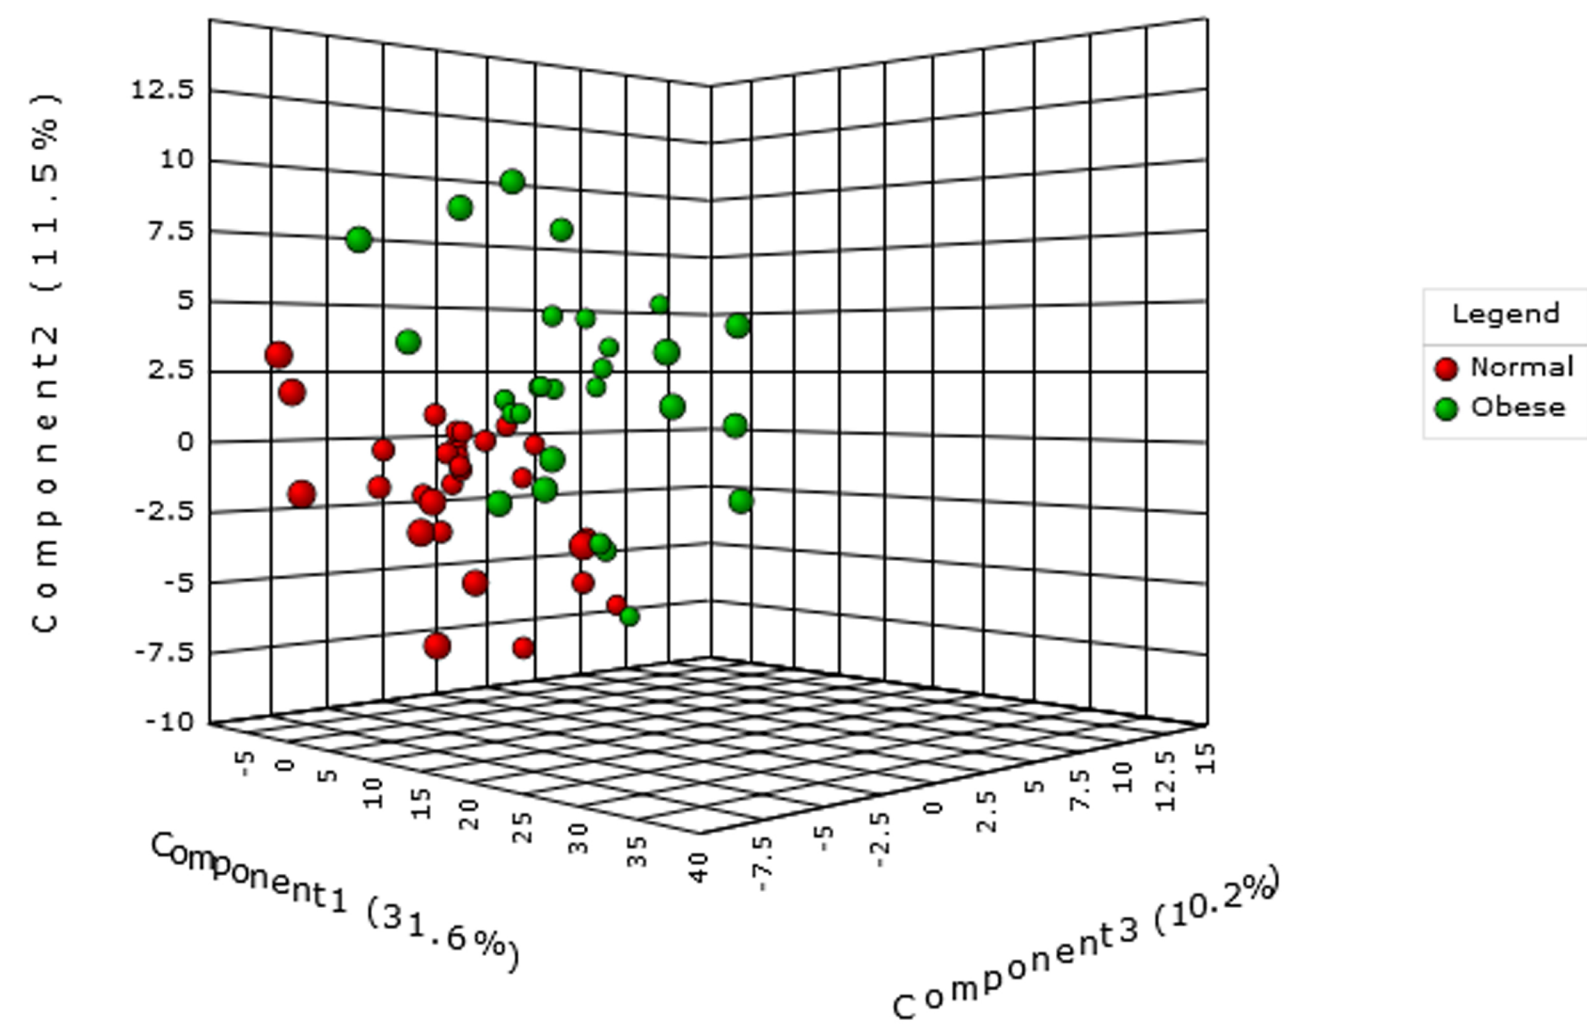**B**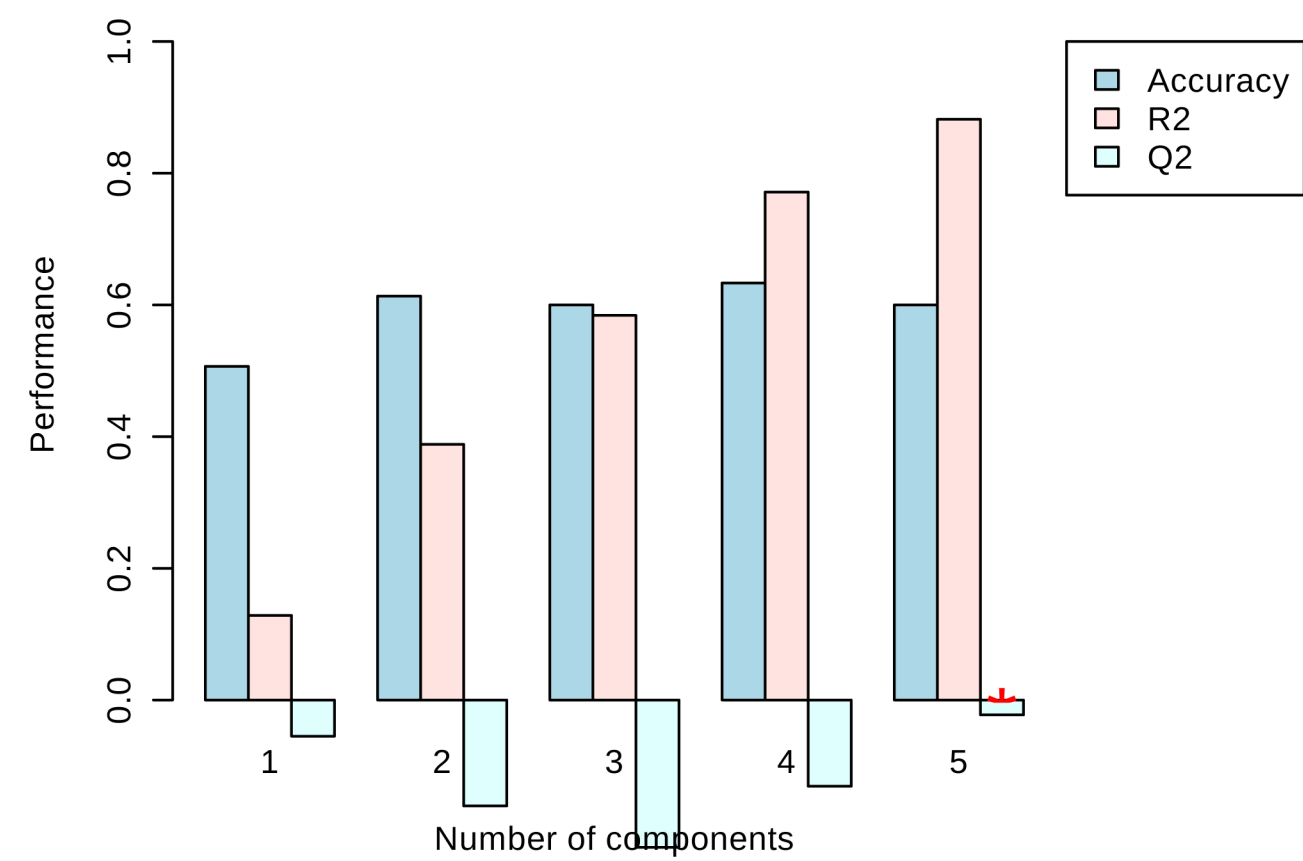

**A**

Cross validation best RMSE for differing values of alpha

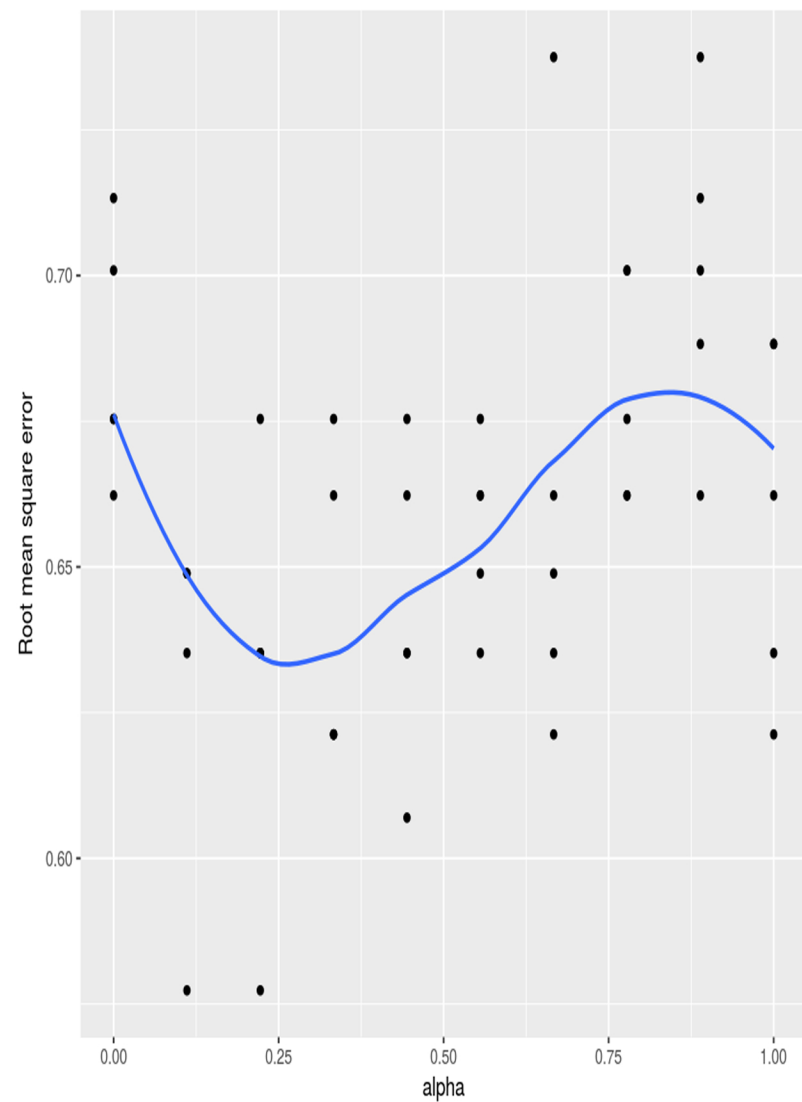**B**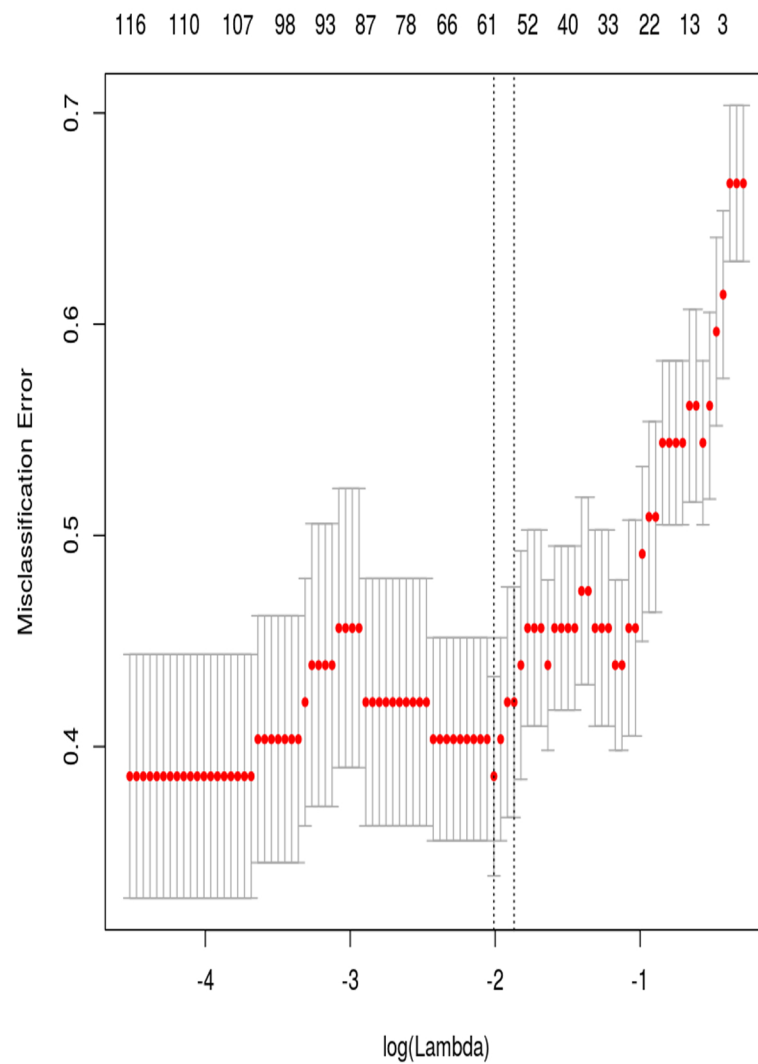**C**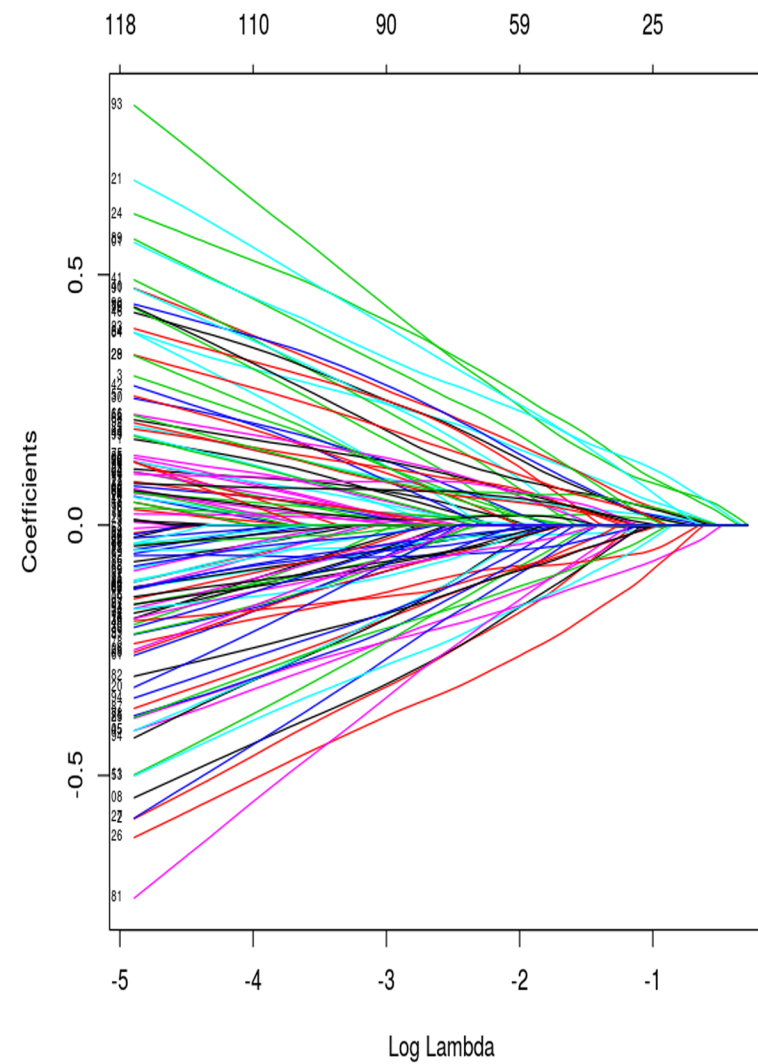

Supplement: Supplementary file [file 264374-1.pdf]
