# Supplementary material for: Pre-pregnant obesity of mothers in a multi-ethnic cohort is associated with cord blood metabolomic changes in offspring
Source: bioRxiv or medRxiv preprint supplement (doi:10.1101/264374), 2019-12-25
Supplement: Supplementary file [file media-4.pdf]

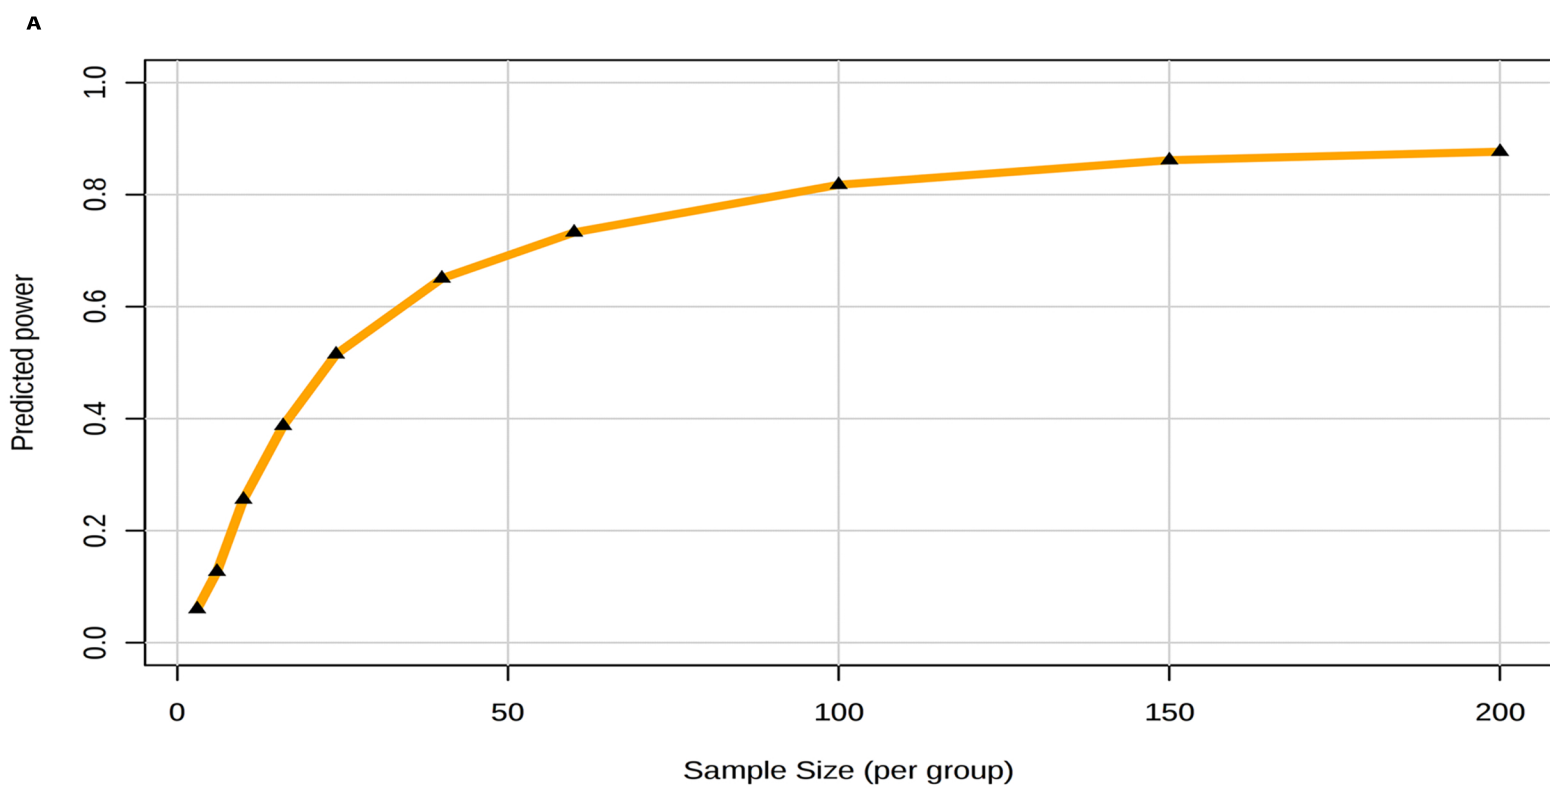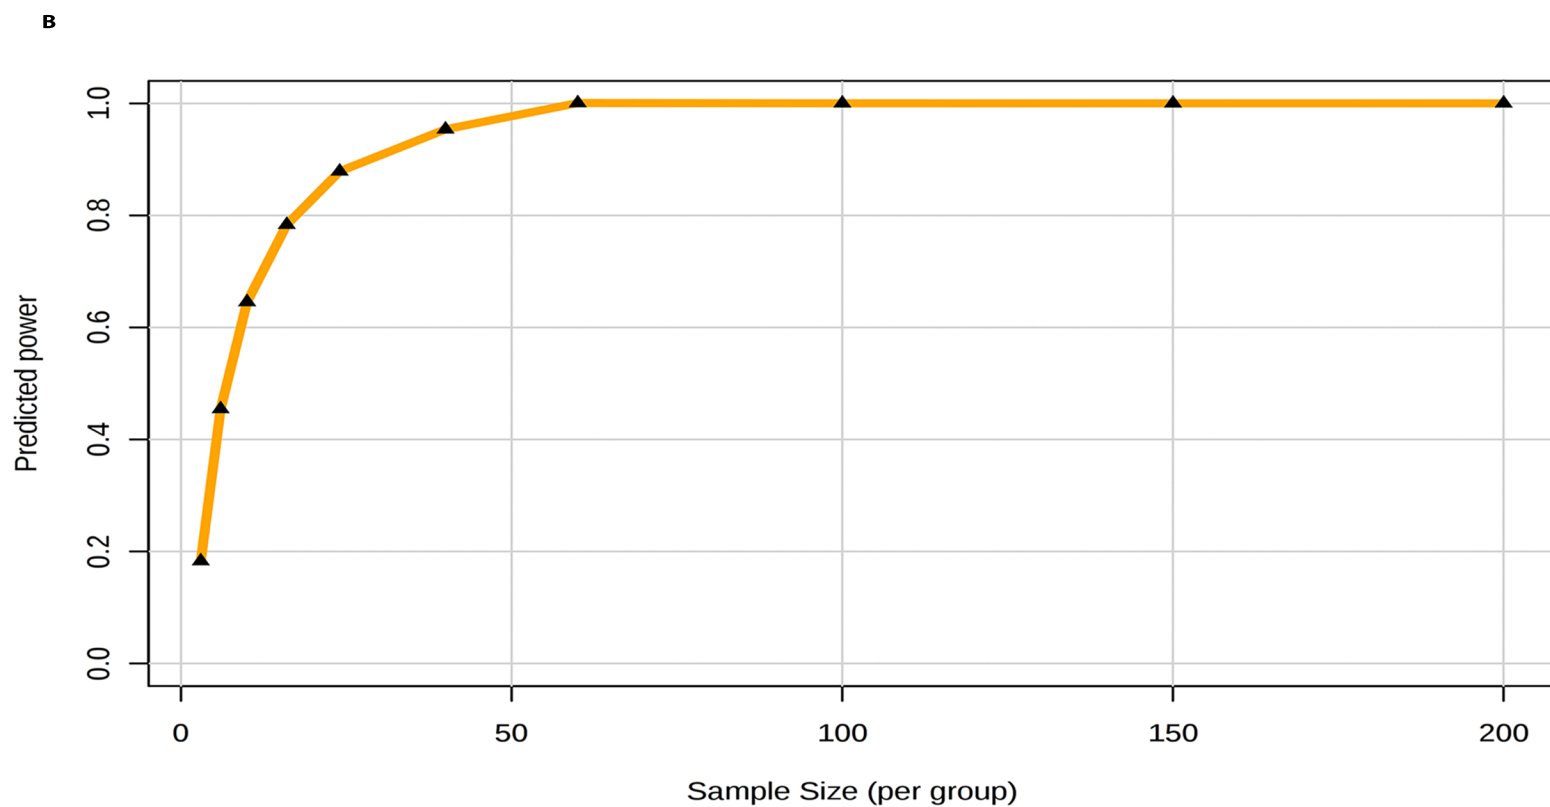

Supplementary Figure 4: Power analysis and sample size estimation plot using (A) 230 metabolites and (B) 29 metabolites that were selected by elastic-net model.
